# Supplementary material for: A Complex Network of Sigma Factors and sRNA StsR Regulates Stress Responses in R. sphaeroides
Source: MDPI journal article supplement (doi:10.3390/ijms22147557), 2021-07-14
Supplement: s1 [file s1]

# Supplementary Material

**Table S1.** Expression levels based on DEseq2 analysis for genes with a log<sub>2</sub>-fold change  $\geq 1.0$  or  $\leq -1.0$  between the wild type and  $\Delta$ StsR and an adjusted  $p$ -value  $\leq 0.05$ : see separate Excel-file.

**Table S2.** Oligodeoxynucleotide sequences for cloning, real-time RT-PCR and northern blot.

| Oligodeoxynucleotide Cloning | Sequence 5'–3'                            |
|------------------------------|-------------------------------------------|
| rpoE_f                       | TCTAGAAGGACGTTAAGATCACGGC                 |
| rpoE_r                       | AAGCTTCACCTTCGGCGCAAAG                    |
| T7_StsR_f                    | TAATACGACTCACTATAGCCGTTCTACCTT<br>CACTGTC |
| T7_StsR_r                    | AAAAAAAAAGCGCCCTGAC                       |
| T7_rpoE_f                    | TAATACGACTCACTATAGGGCAAGGGGA              |
| T7_rpoE_r                    | CTGCCGGATTTTCATCAGGAAG                    |
| <b>Real-time RT-PCR</b>      |                                           |
| rpoZ_A                       | ATCGCGGAAGAGACCCAGAG                      |
| rpoZ_B                       | GAGCAGCGCCATCTGATCCT                      |
| rpoE_A                       | GTCTGGCAGAAGGCTCAT                        |
| rpoE_B                       | GTTCTCCTGCTGCATCTC                        |
| rpoH <sub>II</sub> _A        | GCCGATGAACGACCTGAT                        |
| rpoH <sub>II</sub> _B        | AAGAACAGCGCCTTCTGG                        |
| rpoH <sub>I</sub> _A         | GATCGCCAAGGATCT                           |
| rpoH <sub>I</sub> _B         | CTGGTCGCTGTCTTCA                          |
| prfA_A                       | AACTCGGGGCCGACAGG                         |
| prfA_B                       | GCCTGGGCGATCGCCT                          |
| appA_A                       | ACGGCCCTGATATTTCAGGTTTCG                  |
| appA_B                       | TGTTGCATCCTTCGCCCCCTTAC                   |
| bchI_A                       | GGGCGCGCTCGACATCGA                        |
| bchI_B                       | ACTGCGCCACGTCGAGGA                        |
| <b>Northern Blot</b>         |                                           |
| p_CcsR1                      | CGTCGCCGCTGCTGCTACAGGTC                   |
| p_PcrZ                       | GCAGTCGCCGGATACTCGTTACC                   |
| p_SorX                       | CCGGGAAGCGCGAGAGAAG                       |
| p_SorY                       | ATGAAGCGGACGAGAGAACCCTC                   |
| p_PcrX                       | AAGGGAACCGGGCTGTGGTGTG                    |
| p_5S                         | CTTGAGACGCAGTACCATTG                      |

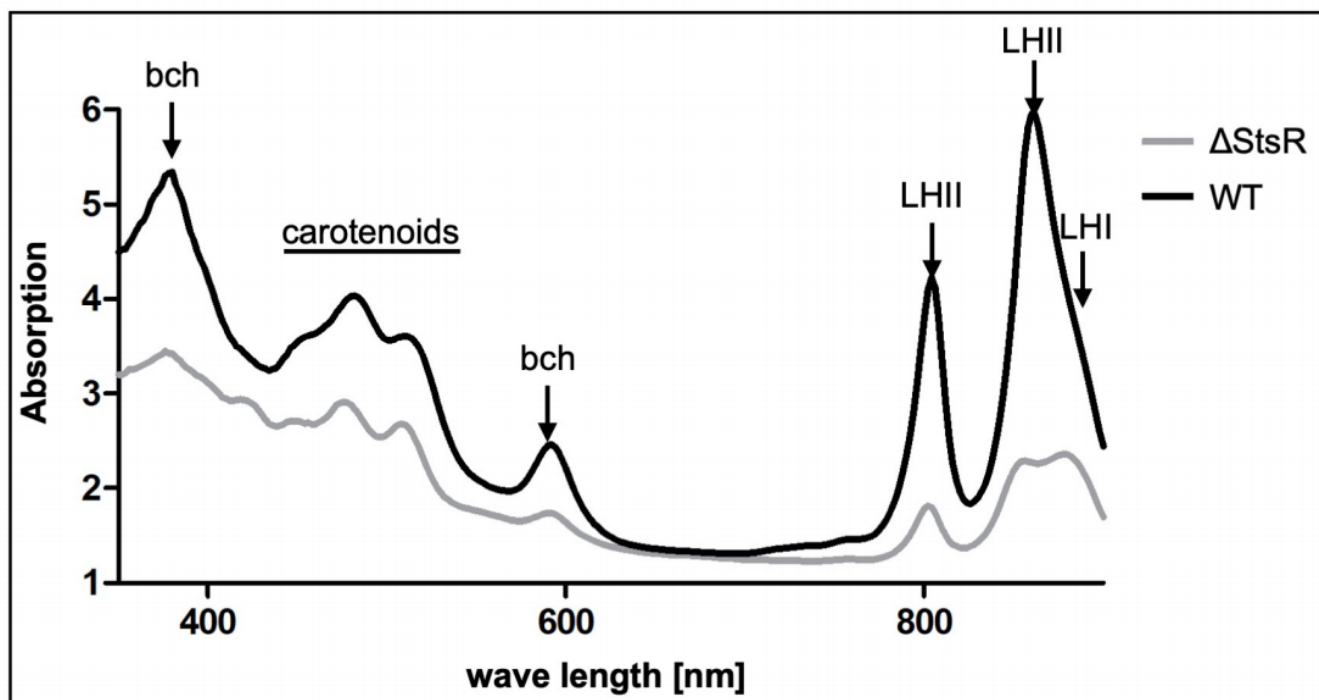

**Figure S1.** Absorption spectra of wild type (black) and DStsR (grey) grown under phototrophic conditions to an OD<sub>660</sub> of 1.5. The absorption peak at 800 nm is mostly caused by LHII complexes, the peak at 860 nm by LHI and LHII (LHI absorbance: 855 nm, LHI absorbance: 875 nm). Peaks at 375 nm and 590 nm stem from absorbance of bacteriochlorophyll independently to its protein association. Absorbances between 430 nm and 520 nm stem from carotenoids.

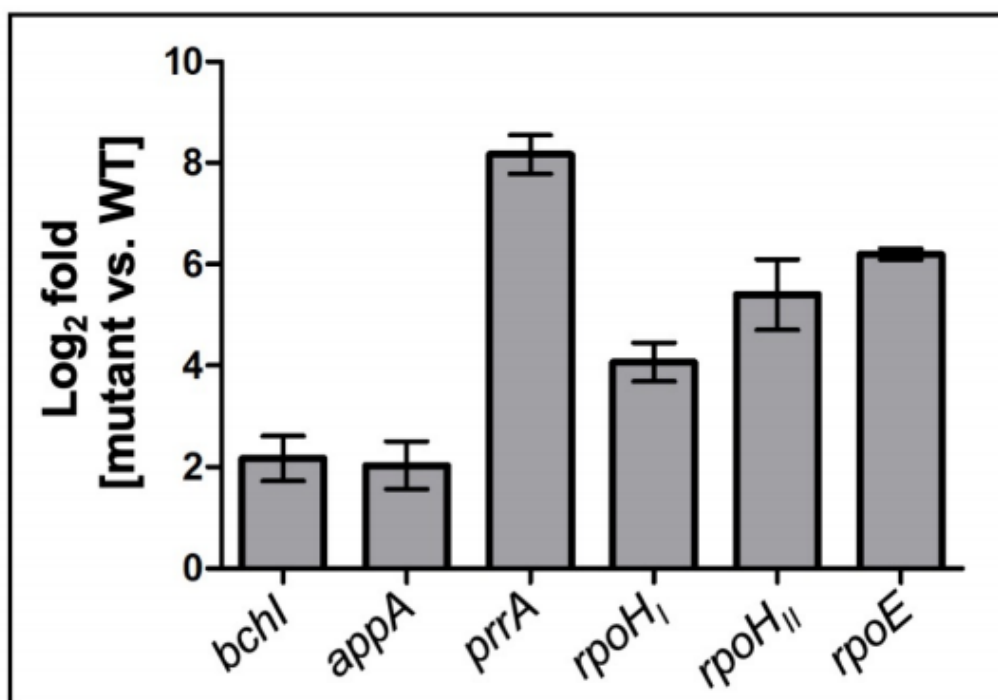

**Figure S2.** Ratio of expression (log<sub>2</sub>-fold change) of selected genes as determined by real time RT PCR in the DStsR mutant compared to the wild type. An in vitro transcript of sinI RNA, an external spike-in RNA of known sequence and quantity, was used for normalization.

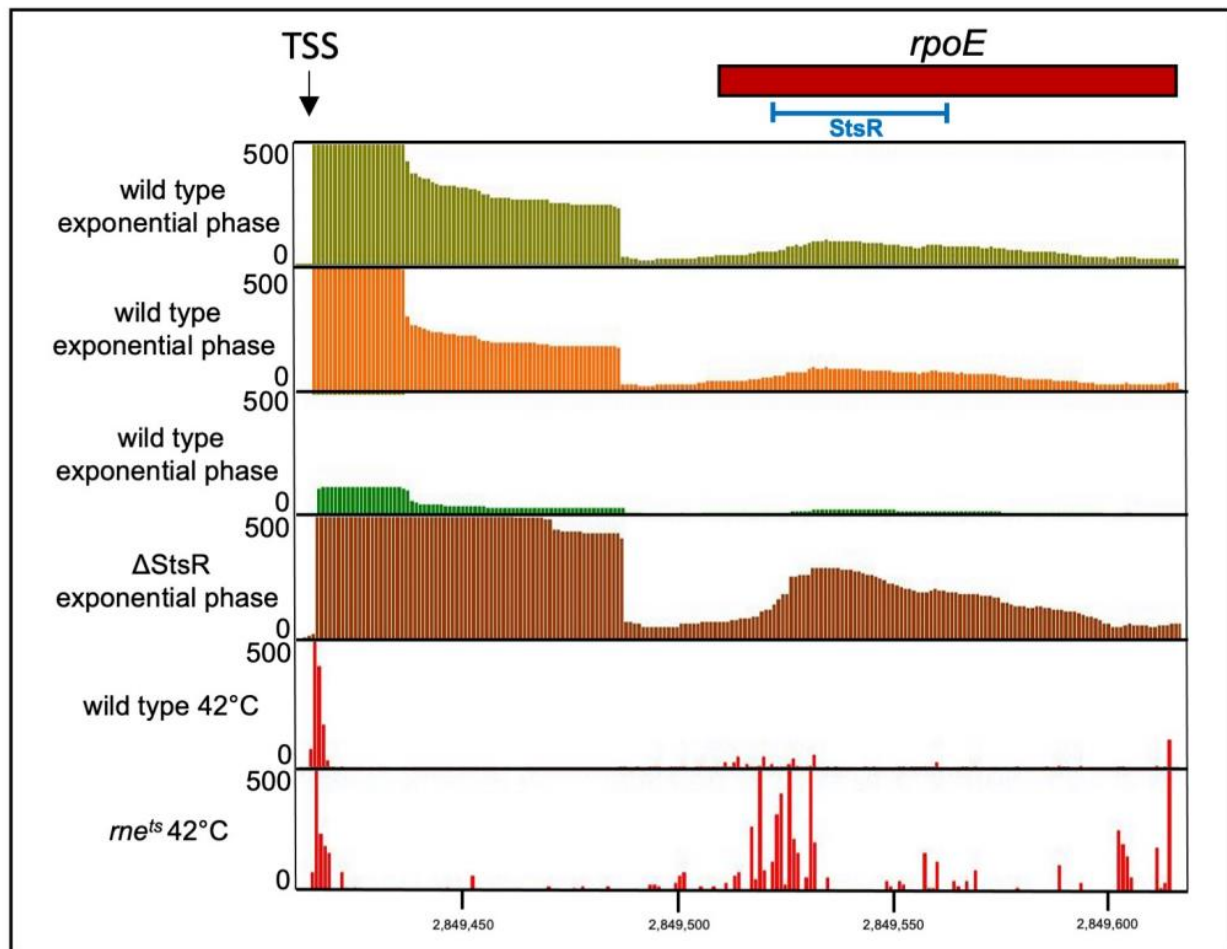

**Figure S3.** RNase E cleavage sites within the *rpoE* mRNA. Normalized read counts from RNAseq, visualized by the Integrated Genome browser are shown. The 4 upper panels show total reads, while the two lower panels only show mapped 5'ends. 5'ends that are more abundant in the wild type at 42 °C than in the mutant with a temperature sensitive RNase E (*rnets*) indicate RNase E dependent cleavage. The transcriptional start site (TSS) is indicated and the blue bar marks the *rpoE* region that interacts to StsR.
