# Supplementary material for: A Complex Network of Sigma Factors and sRNA StsR Regulates Stress Responses in R. sphaeroides
Source: Int J Mol Sci. 2021 Jul 14;22(14):7557. doi: 10.3390/ijms22147557 (PMC8307010; doi:10.3390/ijms22147557)
Supplement: Supplementary file 1 [file ijms-22-07557-s001.zip › Supplementary Table S1.xlsx]

## Sheet: Tabelle1
		Genes with lower expression (log2fold change ≤ 1) in the stsR mutant in stationary phase									Genes with higher expression (log2fold chande≥ 1) in the stsR mutant in stationary phase
		baseMean	log2FoldChange	pvalue	padj	Locus_tag	Gene
		10.9582	-6.50544	3.04492e-07	2.16533e-06	RSP_4027	RSP_4027				baseMean	log2FoldChange	pvalue	padj	Locus_tag	Gene
		12.8476	-6.47569	1.66472e-07	1.23645e-06	RSP_3967	RSP_3967				1110.79	7.06499	5.7097e-17	1.12767e-15	RSP_0019	RSP_0019
		20.6072	-6.1472	7.56397e-07	5.04072e-06	RSP_4029	yihV				666.691	6.20625	5.05988e-61	1.15711e-58	RSP_4246	RSP_4246
		10.104	-6.03351	1.4198e-06	9.07211e-06	RSP_4000	proV				67.5828	5.61692	2.0504e-06	1.27453e-05	RSP_7572	RSP_7572
		15.6129	-5.25489	5.3057e-05	0.000240138	RSP_3947	RSP_3947				23.7173	4.97888	1.00636e-06	6.56552e-06	RSP_3745	RSP_3745
		126.448	-5.22125	7.01204e-63	1.90421e-60	RSP_3316	RSP_3316				16.5814	4.95232	3.35508e-05	0.000159495	RSP_7507	RSP_7507
		16.5181	-5.1839	0.000184052	0.000734348	RSP_4018	RSP_4018				3221	4.67668	7.74774e-104	8.41599e-101	RSP_3509	expE1
		11.0044	-5.17907	0.000195417	0.000774009	RSP_1127	ElaA				32.488	4.5204	6.72616e-10	7.00843e-09	RSP_3746	RSP_3746
		36.4414	-5.14951	1.98295e-19	4.44118e-18	RSP_2964	RSP_2964				16.6303	4.37233	2.01317e-05	0.000100891	RSP_7377	RSP_7377
		15.737	-5.02693	0.000128257	0.000534814	RSP_3977	RSP_3977				556.298	4.25396	1.98877e-81	1.08015e-78	RSP_7322	RSP_7322
		89.6487	-4.76653	0.000983884	0.00321669	RSP_3986	RSP_3986				35.2625	4.23406	0.00049877	0.00176335	RSP_3107	RSP_3107
		245.714	-4.56668	7.32273e-07	4.88744e-06	RSP_3988	RSP_3988				81.4058	4.1869	3.66211e-23	1.08985e-21	RSP_0619	RSP_0619
		30.2787	-4.54797	0.000769269	0.00259107	RSP_2824	cobJ				13.4803	4.14544	0.000509322	0.00179627	RSP_2074	RSP_2074
		11.4436	-4.54504	0.000775	0.002603	RSP_4017	RSP_4017				218.121	3.94386	5.66544e-48	5.72473e-46	RSP_3453	RSP_3453
		34.4907	-4.54137	0.000740243	0.00251278	RSP_3982	RSP_3982				127.364	3.9427	6.5947e-25	2.09153e-23	RSP_3119	RSP_3119
		128.48	-4.51495	6.60202e-05	0.000290931	RSP_3985	RSP_3985				427.895	3.87708	5.00305e-34	2.75168e-32	RSP_0386	RSP_0386
		17.2871	-4.51456	7.13812e-05	0.000312024	RSP_2240	RSP_2240				740.719	3.73481	2.65044e-55	3.83872e-53	RSP_3118	RSP_3118
		12.4789	-4.45405	2.09055e-06	1.29578e-05	RSP_0515	RSP_0515				319.343	3.72608	3.25275e-26	1.12168e-24	RSP_0087	RSP_0087
		26.6211	-4.40097	5.96803e-11	7.0465e-10	RSP_3258	RSP_3258				428.234	3.70763	1.23224e-58	2.14163e-56	RSP_1624	RSP_1624
		11.8208	-4.36115	3.69034e-06	2.14652e-05	RSP_0036	flgA				1347.57	3.70724	5.17824e-64	1.6071e-61	RSP_6254	RSP_6254
		79.7282	-4.32473	1.91794e-21	4.93104e-20	RSP_3498	RSP_3498				27.4742	3.64783	0.00224723	0.00672467	RSP_0307	RSP_0307
		38.8762	-4.22702	8.18757e-06	4.40285e-05	RSP_3974	RSP_3974				198.396	3.644	1.05631e-18	2.27212e-17	RSP_0416	RSP_0416
		26.428	-4.22015	0.00229313	0.00684007	RSP_7367	RSP_7367				157.025	3.62667	2.62298e-23	7.91449e-22	RSP_1423	RSP_1423
		29.2527	-4.19031	4.87796e-25	1.5817e-23	RSP_1650	RSP_1650				291.369	3.54726	4.69323e-32	2.42763e-30	RSP_0611	RSP_0611
		14.4795	-4.18381	0.00723817	0.0186425	RSP_3939	RSP_3939				122.148	3.5287	1.9344e-15	3.4306e-14	RSP_0960	RSP_0960
		14.7728	-4.1817	0.00721604	0.0186088	RSP_3959	RSP_3959				70.5604	3.51662	0.00331894	0.00948737	RSP_0402	RSP_0402
		16.2996	-4.17885	0.00754843	0.0193042	RSP_3390	RSP_3390				85.1276	3.50623	7.10617e-09	6.52776e-08	RSP_7363	RSP_7363
		129915	-4.17811	3.39094e-40	2.49722e-38	RSP_4324	RSP_4324				78.0509	3.45934	2.79471e-19	6.19542e-18	RSP_3454	RSP_3454
		129915	-4.17811	3.39094e-40	2.49722e-38	RSP_4348	RSP_4348				333.502	3.42311	6.37129e-27	2.28787e-25	RSP_1409	RSP_1409
		129915	-4.17811	3.39094e-40	2.49722e-38	RSP_4353	RSP_4353				23.7687	3.37327	0.00534294	0.0143215	RSP_3638	RSP_3638
		16.7301	-4.16407	0.000364821	0.00133318	RSP_3308	RSP_3308				761.897	3.35444	1.8005e-53	2.44474e-51	RSP_0427	RSP_0427
		21.888	-4.16028	0.000361709	0.00132403	RSP_0567	RSP_0567				328.061	3.33431	2.40502e-49	2.61245e-47	RSP_2045	RSP_2045
		49.1727	-4.15236	0.00035127	0.00128799	RSP_3993	RSP_3993				22.6763	3.32719	6.08307e-07	4.14278e-06	RSP_3744	RSP_3744
		14112.5	-4.11511	1.62049e-89	1.00586e-86	RSP_4325	RSP_4325				1870.11	3.32356	8.26985e-63	2.11368e-60	RSP_7578	RSP_7578
		14112.5	-4.11511	1.62049e-89	1.00586e-86	RSP_4349	RSP_4349				68.8459	3.27279	1.29208e-06	8.31714e-06	RSP_2624	RSP_2624
		14112.5	-4.11511	1.62049e-89	1.00586e-86	RSP_4354	RSP_4354				212.989	3.22376	3.76836e-27	1.3757e-25	RSP_2279	RSP_2279
		20.3367	-4.08455	2.73142e-05	0.000132014	RSP_3065	RSP_3065				32.656	3.21037	0.000156631	0.00063426	RSP_1214	RSP_1214
		392.076	-4.05322	2.31044e-67	9.12623e-65	RSP_3101	RSP_3101				266.59	3.19716	3.52952e-33	1.91697e-31	RSP_1145	RSP_1145
		47.6793	-3.99961	3.29074e-10	3.59253e-09	RSP_4271	fhuB				114.234	3.19652	2.13409e-22	5.86874e-21	RSP_3871	modA
		12.8584	-3.94637	5.30749e-06	2.98718e-05	RSP_3953	gtpD				679.036	3.17734	2.98622e-31	1.42584e-29	RSP_0904	sitA
		423.599	-3.93514	4.05069e-73	1.76002e-70	RSP_3403	RSP_3403				14.326	3.15962	0.00956305	0.0237301	RSP_7372	RSP_7372
		29.6123	-3.93423	5.03266e-05	0.000229453	RSP_0051	torF				2778.53	3.15797	4.62153e-23	1.35679e-21	RSP_1109	cysK1
		83.3433	-3.86621	2.08498e-11	2.62586e-10	RSP_1439	RSP_1439				363.491	3.15536	2.62116e-55	3.83872e-53	RSP_7597	RSP_7597
		29.3734	-3.83982	2.29867e-14	3.72676e-13	RSP_6092	RSP_6092				22.5846	3.15331	3.16053e-05	0.000150906	RSP_7381	RSP_7381
		14.275	-3.8121	0.00905924	0.0226091	RSP_0081	flgD				51.3445	3.15041	2.78934e-11	3.43948e-10	RSP_1921	RSP_1921
		209.236	-3.8097	8.86936e-57	1.42731e-54	RSP_4122	RSP_4122				537.578	3.11664	1.01588e-29	4.28544e-28	RSP_4139	parA
		31.9765	-3.80747	2.64033e-10	2.91173e-09	RSP_2628	gltX/glnS				14.5054	3.11348	0.0110719	0.0270265	RSP_6120	RSP_6120
		33.8212	-3.80563	0.00848973	0.0214215	RSP_3941	yurO				172.45	3.1123	1.40154e-13	2.11447e-12	RSP_2430	RSP_2430
		89.2693	-3.8024	0.00850479	0.0214471	RSP_3984	kaiC2				735.164	3.08192	4.13484e-52	4.85565e-50	RSP_3007	RSP_3007
		26.4121	-3.76824	3.90434e-11	4.71232e-10	RSP_3259	RSP_3259				98.7419	3.07753	1.64483e-10	1.86114e-09	RSP_1161	RSP_1161
		31.3075	-3.76395	0.000132397	0.000548918	RSP_0478	RSP_0478				736.006	3.07368	3.49858e-28	1.36949e-26	RSP_0905	sitB
		142.555	-3.73537	1.04272e-18	2.25404e-17	RSP_3880	flbT				1990.76	3.0687	6.31227e-109	9.14227e-106	RSP_1140	ilvE1
		42.9533	-3.69059	4.36809e-05	0.000201265	RSP_0058	fliK				31.6772	3.0683	3.89393e-07	2.7245e-06	RSP_6024	RSP_6024
		82.2445	-3.68165	6.53384e-36	3.83642e-34	RSP_3252	RSP_3252				476.994	3.05803	5.9702e-39	4.11754e-37	RSP_0316	RSP_0316
		260.466	-3.66505	5.67996e-15	9.83245e-14	RSP_0463	RSP_0463				118.245	3.03441	5.92532e-17	1.15971e-15	RSP_7190	RSP_7190
		58.736	-3.60901	4.18235e-38	2.75338e-36	RSP_3420	RSP_3420				232.886	3.0112	7.6009e-32	3.71078e-30	RSP_3620	RSP_3620
		54.4171	-3.56966	0.000350744	0.00128715	RSP_4025	fsr				44.8075	3.00898	2.48207e-10	2.74417e-09	RSP_3455	RSP_3455
		11.3487	-3.51741	1.05448e-06	6.86913e-06	RSP_4203	RSP_4203				217.435	3.00414	3.54908e-20	8.51975e-19	RSP_4093	RSP_4093
		23.5023	-3.50558	1.13912e-05	5.94176e-05	RSP_0538	nifE				15.7846	2.9901	0.000675395	0.0023107	RSP_1457	RSP_1457
		25.9566	-3.47944	4.78629e-10	5.09716e-09	RSP_3565	RSP_3565				168.372	2.98649	2.40096e-13	3.56047e-12	RSP_3755	RSP_3755
		454.263	-3.47289	4.45783e-78	2.15214e-75	RSP_1005	gshA				104.92	2.97727	9.61001e-18	1.97893e-16	RSP_4247	RSP_4247
		81.8861	-3.46707	3.60208e-29	1.49058e-27	RSP_2745	RSP_2745				37.1864	2.96862	0.014077	0.0333141	RSP_2371	RSP_2371
		305.695	-3.41153	2.3888e-50	2.66137e-48	RSP_0671	RSP_0671				1165.74	2.96024	9.02871e-60	1.78317e-57	RSP_2220	RSP_2220
		186.692	-3.37469	2.02627e-22	5.64369e-21	RSP_2107	murG				143.197	2.93875	5.73051e-32	2.86196e-30	RSP_2125	RSP_2125
		13.3501	-3.35199	4.50658e-06	2.58073e-05	RSP_2259	RSP_2259				2690.54	2.91836	9.33228e-67	3.11914e-64	RSP_1016	RSP_1016
		409.706	-3.31384	7.80382e-46	6.91992e-44	RSP_1252	RSP_1252				16.7922	2.9103	0.000117823	0.000493675	RSP_3452	RSP_3452
		53.4585	-3.24641	3.61859e-19	7.9811e-18	RSP_3260	amiC				296.396	2.9102	3.48918e-28	1.36949e-26	RSP_4186	repA
		33.2686	-3.23897	2.00734e-06	1.25315e-05	RSP_2155	hisD				46.7801	2.89772	0.000642227	0.00221291	RSP_0822	RSP_0822
		61.3923	-3.23225	9.85903e-23	2.83692e-21	RSP_2874	RSP_2874				807.221	2.89598	3.16116e-38	2.11311e-36	RSP_6213	cerA
		12547.3	-3.2253	1.72785e-36	1.0725e-34	RSP_4298	RSP_4298				231.251	2.8862	6.80124e-32	3.35811e-30	RSP_3363	RSP_3363
		39.833	-3.21107	2.21501e-12	2.9982e-11	RSP_3367	RSP_3367				142.935	2.87846	1.86171e-14	3.05249e-13	RSP_2621	ctrA
		10.8179	-3.13882	2.93411e-06	1.74879e-05	RSP_0208	RSP_0208				185.148	2.87202	5.66046e-09	5.24407e-08	RSP_7382	RSP_7382
		17.3998	-3.12448	7.22988e-06	3.92673e-05	RSP_3931	RSP_3931				580.311	2.84086	1.54917e-47	1.49581e-45	RSP_1771	RSP_1771
		200.264	-3.09042	1.23628e-25	4.13202e-24	RSP_2118	recN				156.117	2.82986	0.000765902	0.00258172	RSP_3117	RSP_3117
		13.9743	-3.07685	7.48272e-08	5.81617e-07	RSP_0581	RSP_0581				55.8323	2.82388	1.40132e-08	1.22264e-07	RSP_7518	RSP_7518
		241.478	-3.07401	1.01266e-19	2.32805e-18	RSP_0922	RSP_0922				20.134	2.80561	0.021065	0.0471549	RSP_3702	RSP_3702
		429.222	-3.0633	4.33299e-30	1.92111e-28	RSP_1440	RSP_1440				38.0713	2.79396	2.10934e-08	1.77618e-07	RSP_3742	RSP_3742
		47.3483	-3.05116	1.94474e-10	2.18344e-09	RSP_3392	RSP_3392				100.623	2.77059	6.79234e-10	7.06046e-09	RSP_2712	fabZ
		13.5947	-3.04534	9.1281e-09	8.14407e-08	RSP_1269	kdpE				802.704	2.74071	2.21223e-50	2.52951e-48	RSP_2544	RSP_2544
		22.4778	-3.02569	0.00025995	0.000989906	RSP_3049	moeA				109.941	2.73789	3.63171e-08	2.93851e-07	RSP_3510	RSP_3510
		17.5879	-3.02522	0.000284372	0.00106793	RSP_0032	fliA				158.011	2.73535	2.68546e-15	4.72402e-14	RSP_6104	RSP_6104
		18.0044	-2.99919	2.11494e-06	1.30717e-05	RSP_4236	RSP_4236				664.297	2.73142	3.45199e-63	9.99927e-61	RSP_0443	RSP_0443
		15.0019	-2.99652	2.5169e-05	0.000122876	RSP_3062	RSP_3062				58.3454	2.7007	2.14673e-14	3.49346e-13	RSP_3534	RSP_3534
		216.872	-2.98601	6.79473e-44	5.6137e-42	RSP_1715	rpsJ				83.4869	2.68507	1.61516e-15	2.91198e-14	RSP_4073	RSP_4073
		19.1949	-2.97505	1.67246e-07	1.24008e-06	RSP_4068	RSP_4068				360.065	2.67546	2.00387e-46	1.81392e-44	RSP_2784	cycG
		246.426	-2.97324	1.62225e-15	2.91267e-14	RSP_0921	exbD				27.9164	2.66368	1.16626e-05	6.0615e-05	RSP_0608	RSP_0608
		80.6475	-2.9546	3.20583e-31	1.51406e-29	RSP_3255	RSP_3255				93.9544	2.64154	1.82495e-14	3.01269e-13	RSP_1194	grxC
		207.98	-2.94703	1.01529e-21	2.6899e-20	RSP_0016	RSP_0016				67.2327	2.64147	8.59496e-14	1.33375e-12	RSP_3456	RSP_3456
		96.4165	-2.93864	4.8862e-23	1.42487e-21	RSP_3253	RSP_3253				42.7531	2.61911	9.1376e-05	0.000393878	RSP_3708	mcpJ
		31.0922	-2.93615	1.1253e-05	5.87671e-05	RSP_3058	RSP_3058				20.1196	2.61008	9.28286e-05	0.000399347	RSP_2501	RSP_2501
		144.22	-2.91236	1.44049e-10	1.64708e-09	RSP_1438	RSP_1438				961.191	2.60712	6.55995e-59	1.18762e-56	RSP_0452	recA
		429.123	-2.90858	1.08913e-38	7.39416e-37	RSP_1257	phbC				591.401	2.607	1.32473e-58	2.21382e-56	RSP_1199	RSP_1199
		48.6593	-2.9026	3.43202e-09	3.31381e-08	RSP_1017	RSP_1017				187.51	2.60503	5.31927e-22	1.42668e-20	RSP_3747	RSP_3747
		61.3279	-2.88587	6.10989e-06	3.38616e-05	RSP_1500	RSP_1500				132.321	2.60352	4.96283e-19	1.08907e-17	RSP_7680	RSP_7680
		19.0114	-2.88423	6.7864e-06	3.70905e-05	RSP_0645	RSP_0645				255.233	2.60238	2.13141e-07	1.55125e-06	RSP_3640	RSP_3640
		25.6192	-2.84953	2.46199e-07	1.77108e-06	RSP_1266	kdpB				236.931	2.60211	3.05044e-36	1.81564e-34	RSP_6042	RSP_6042
		49.1834	-2.84281	1.54116e-16	2.97615e-15	RSP_2362	RSP_2362				16.273	2.60162	0.011695	0.0283406	RSP_7509	RSP_7509
		43.1277	-2.81109	4.02417e-05	0.000187005	RSP_2896	RSP_2896				173.63	2.59898	7.73402e-09	7.01552e-08	RSP_6151	RSP_6151
		10.8254	-2.79747	2.92179e-06	1.74624e-05	RSP_3407	serA				466.836	2.59776	6.50328e-26	2.19044e-24	RSP_7618	RSP_7618
		20.9228	-2.7833	4.27181e-09	4.05262e-08	RSP_3343	RSP_3343				94.5051	2.5964	3.95338e-09	3.75874e-08	RSP_2631	RSP_2631
		380919	-2.77516	1.93788e-27	7.38603e-26	RSP_4347	RSP_4347				12.9155	2.59279	0.00262503	0.00768581	RSP_3264	RSP_3264
		372870	-2.77102	3.52879e-27	1.29937e-25	RSP_4294	RSP_4294				693.517	2.58947	7.40291e-37	4.73024e-35	RSP_3861	RSP_3861
		14.0514	-2.77101	0.000514289	0.00181085	RSP_1819	feoA1				47.7594	2.5872	5.94442e-06	3.30711e-05	RSP_6241	RSP_6241
		101.428	-2.76574	5.60492e-31	2.59078e-29	RSP_1926	RSP_1926				1213.5	2.57956	3.33316e-42	2.58617e-40	RSP_7679	RSP_7679
		30.9292	-2.76463	1.60136e-10	1.82144e-09	RSP_2558	RSP_2558				385.816	2.57828	5.30105e-32	2.67827e-30	RSP_0086	RSP_0086
		29.1896	-2.76277	2.13428e-05	0.000106104	RSP_1817	RSP_1817				188.959	2.56854	9.08922e-24	2.78117e-22	RSP_4107	RSP_4107
		161.383	-2.75328	1.14613e-07	8.70618e-07	RSP_1911	RSP_1911				74.511	2.55935	4.06295e-08	3.23917e-07	RSP_7575	RSP_7575
		95.5654	-2.74685	5.22055e-05	0.000237273	RSP_2353	RSP_2353				241.549	2.55856	3.05211e-09	2.96676e-08	RSP_0217	int
		69.0989	-2.74397	6.66123e-12	8.614e-11	RSP_2337	RSP_2337				57.3484	2.55837	2.61668e-05	0.000127175	RSP_6231	RSP_6231
		39.9819	-2.73028	6.65995e-14	1.05227e-12	RSP_1779	ispE				592.121	2.53593	1.52924e-24	4.81488e-23	RSP_3634	RSP_3634
		53.0356	-2.72533	2.04101e-10	2.27974e-09	RSP_0494	hypF				276.367	2.5303	2.36201e-18	4.9341e-17	RSP_4157	RSP_4157
		555361	-2.72069	2.25376e-36	1.36008e-34	RSP_4352	RSP_4352				180.881	2.52878	6.82267e-16	1.2723e-14	RSP_6002	RSP_6002
		37.7546	-2.71115	0.000235477	0.000911084	RSP_3402	RSP_3402				96.569	2.5264	1.01794e-13	1.56289e-12	RSP_3810	RSP_3810
		64.1272	-2.68862	1.05111e-08	9.28268e-08	RSP_0677	RSP_0677				1492.31	2.51741	1.7184e-179	7.46646e-176	RSP_2410	rpoH1
		42.9079	-2.67665	2.01569e-10	2.25726e-09	RSP_0789	cobC				324.225	2.51696	3.56778e-12	4.75522e-11	RSP_2611	ihfA
		34.6506	-2.67556	1.30576e-07	9.81579e-07	RSP_4272	fhuD				185.312	2.51426	6.37682e-12	8.27083e-11	RSP_0631	RSP_0631
		29.0582	-2.6752	0.000130205	0.000541379	RSP_2406	RSP_2406				15.2944	2.49853	0.0035372	0.0100583	RSP_3491	RSP_3491
		101.455	-2.66649	0.00657987	0.0171606	RSP_3665	RSP_3665				125.249	2.49615	3.86219e-05	0.000180832	RSP_0826	RSP_0826
		15.7962	-2.65584	3.85575e-09	3.68203e-08	RSP_0546	nifB				17.609	2.48576	0.0160493	0.0373509	RSP_3012	RSP_3012
		12.6512	-2.65338	1.83382e-07	1.34654e-06	RSP_3467	RSP_3467				220.106	2.48221	3.19986e-08	2.60852e-07	RSP_0002	spbB
		17.4167	-2.64773	7.35811e-05	0.000320672	RSP_2072	RSP_2072				69.1404	2.48152	1.3043e-14	2.19659e-13	RSP_0634	RSP_0634
		61.126	-2.64633	1.29145e-06	8.31714e-06	RSP_3330	sac1				642.37	2.48146	1.85062e-60	3.82903e-58	RSP_0579	RSP_0579
		474.532	-2.63662	7.82473e-36	4.53313e-34	RSP_1398	rpmJ				141.196	2.47782	1.64594e-14	2.74009e-13	RSP_7515	RSP_7515
		43.5429	-2.61396	0.00298464	0.008634	RSP_0109	nuoK1				32.6209	2.47373	1.4331e-05	7.36029e-05	RSP_3792	RSP_3792
		516.412	-2.61303	9.7398e-30	4.14896e-28	RSP_2654	RSP_2654				122.538	2.47216	2.34872e-06	1.43331e-05	RSP_4065	RSP_4065
		12.5749	-2.60791	4.30375e-07	2.98242e-06	RSP_3133	RSP_3133				367.675	2.47215	4.71908e-26	1.61452e-24	RSP_2843	hfq
		14.2579	-2.60197	0.00323227	0.009264	RSP_3712	RSP_3712				230.761	2.46959	6.43745e-10	6.72373e-09	RSP_3342	bfr
		46.7656	-2.59209	1.64573e-05	8.35363e-05	RSP_2256	dtd				17.2752	2.46876	0.0173937	0.0400082	RSP_0066	flhB
		11.501	-2.57398	8.37378e-06	4.47528e-05	RSP_0300	RSP_0300				127.568	2.46276	0.0182903	0.041783	RSP_3078	RSP_3078
		108.333	-2.57056	1.01738e-22	2.90822e-21	RSP_3723	RSP_3723				4171.22	2.45833	1.10616e-60	2.40313e-58	RSP_1185	RSP_1185
		166.238	-2.56705	6.69713e-30	2.9099e-28	RSP_0930	folC				83.2283	2.45341	1.27732e-13	1.94736e-12	RSP_1920	RSP_1920
		546.529	-2.5622	3.37659e-67	1.22261e-64	RSP_0692	rdxB				228.992	2.44396	5.62536e-20	1.32838e-18	RSP_3896	repC
		464514	-2.55562	5.04345e-25	1.62324e-23	RSP_4332	RSP_4332				16613.6	2.43904	8.77822e-43	7.06322e-41	RSP_4315	RSP_4315
		14.2378	-2.54499	1.83464e-07	1.34654e-06	RSP_0856	btaA				465.172	2.4239	1.09629e-48	1.13413e-46	RSP_2425	RSP_2425
		14.8597	-2.53762	0.000891456	0.00294777	RSP_0326	RSP_0326				68.4349	2.42366	1.55001e-16	2.98e-15	RSP_1966	RSP_1966
		50.5749	-2.53737	1.85099e-17	3.75821e-16	RSP_1241	RSP_1241				773.696	2.42023	3.99323e-34	2.22444e-32	RSP_1092	rpoE1
		44.8201	-2.52887	9.38223e-07	6.16729e-06	RSP_2407	RSP_2407				198.381	2.41591	1.28976e-12	1.79042e-11	RSP_7581	RSP_7581
		51.0175	-2.52453	2.25712e-09	2.23398e-08	RSP_0948	otsA				602.397	2.40818	1.84856e-27	7.10794e-26	RSP_6006	RSP_6006
		640.166	-2.51904	4.17429e-29	1.69508e-27	RSP_2131	rne				122.846	2.39669	5.50538e-10	5.82017e-09	RSP_7532	RSP_7532
		61.0921	-2.51764	2.51996e-07	1.80979e-06	RSP_4212	RSP_4212				353.662	2.38027	3.62363e-34	2.04476e-32	RSP_4172	RSP_4172
		832.143	-2.51701	2.92431e-49	3.09905e-47	RSP_1495	RSP_1495				14.8862	2.37984	0.00612317	0.0161341	RSP_3614	RSP_3614
		37.8917	-2.51644	0.000382086	0.00139275	RSP_0877	RSP_0877				491.495	2.37862	1.377e-30	6.17925e-29	RSP_0754	RSP_0754
		22.0804	-2.51609	0.000408688	0.0014761	RSP_7547	RSP_7547				782.757	2.3531	2.77113e-52	3.3446e-50	RSP_0197	clpP
		12.7871	-2.49569	0.000223784	0.000868937	RSP_0647	thiD				40.8165	2.33899	4.34873e-05	0.000200586	RSP_0869	osp
		20.5802	-2.4946	2.8315e-07	2.02017e-06	RSP_3535	RSP_3535				206.629	2.33571	3.20052e-11	3.91726e-10	RSP_6236	RSP_6236
		65.7597	-2.48893	1.71277e-13	2.5662e-12	RSP_3564	RSP_3564				633.652	2.32555	3.93134e-62	9.48982e-60	RSP_6060	RSP_6060
		120.426	-2.48834	1.20235e-07	9.10141e-07	RSP_0670	RSP_0670				308.287	2.3246	1.68715e-21	4.36349e-20	RSP_4285	RSP_4285
		11.0199	-2.48666	0.000267366	0.00101125	RSP_3460	RSP_3460				71.4349	2.31858	0.000640328	0.00220812	RSP_7671	RSP_7671
		24.7581	-2.48117	0.000103969	0.000441174	RSP_2602	pstA				168.738	2.31132	3.50514e-06	2.05531e-05	RSP_2082	RSP_2082
		13.6042	-2.4445	5.54291e-06	3.09562e-05	RSP_3428	RSP_3428				205.598	2.31069	1.45545e-13	2.18822e-12	RSP_2617	RSP_2617
		161.615	-2.43939	2.29481e-11	2.87348e-10	RSP_3215	RSP_3215				314.064	2.30893	1.80329e-34	1.03096e-32	RSP_3860	RSP_3860
		2418.96	-2.38652	8.62194e-123	1.87312e-119	RSP_2115	envA				136.093	2.29668	3.74619e-06	2.17319e-05	RSP_1972	RSP_1972
		239.369	-2.38489	8.08201e-13	1.14454e-11	RSP_0274	bchD				83.6399	2.29211	8.61264e-08	6.63509e-07	RSP_6115	RSP_6115
		405.666	-2.37763	1.52813e-46	1.41271e-44	RSP_2117	comL				298.892	2.28863	2.57107e-27	9.71418e-26	RSP_0578	RSP_0578
		280.506	-2.37413	1.87622e-25	6.1759e-24	RSP_3678	RSP_3678				2498.64	2.28828	1.11781e-29	4.67009e-28	RSP_7566	RSP_7566
		155.893	-2.37196	1.74307e-09	1.76073e-08	RSP_3387	RSP_3387				182.059	2.28083	1.23135e-14	2.08992e-13	RSP_0525	RSP_0525
		15.0935	-2.356	4.63474e-05	0.00021265	RSP_3507	RSP_3507				45.2831	2.27735	5.99544e-05	0.000267456	RSP_1406	RSP_1406
		12.9835	-2.35432	0.000210073	0.000823795	RSP_3796	RSP_3796				94.8266	2.27394	1.24915e-14	2.11189e-13	RSP_7390	RSP_7390
		11.2703	-2.35414	0.0250366	0.0545283	RSP_0078	flgG				184.131	2.25133	1.72961e-19	3.89386e-18	RSP_4112	RSP_4112
		22.4606	-2.35355	3.17055e-06	1.87429e-05	RSP_1753	RSP_1753				143.751	2.25091	1.49147e-12	2.05729e-11	RSP_1360	RSP_1360
		25.3368	-2.35307	0.00162601	0.00503565	RSP_3278	RSP_3278				140.552	2.25006	1.86273e-12	2.53717e-11	RSP_3893	pdhR
		12.8374	-2.34846	0.0224381	0.0497115	RSP_0784	RSP_0784				466.646	2.23437	3.57498e-44	3.04574e-42	RSP_1410	RSP_1410
		91.3312	-2.34689	1.75409e-06	1.10457e-05	RSP_0378	RSP_0378				584.887	2.22403	8.95591e-27	3.18962e-25	RSP_0601	rpoH2
		45.2247	-2.3466	0.00243583	0.00723223	RSP_1476	RSP_1476				617.849	2.22012	5.59078e-21	1.39609e-19	RSP_2688	soxD
		34.1728	-2.34428	2.10381e-05	0.000104949	RSP_3064	RSP_3064				63.4385	2.21812	4.75456e-07	3.27394e-06	RSP_0577	RSP_0577
		17.4659	-2.34404	0.0226895	0.0501453	RSP_2567	sqdC				279.771	2.21549	1.32608e-14	2.22464e-13	RSP_0906	sitC
		28.7044	-2.34202	1.40071e-07	1.04752e-06	RSP_3506	RSP_3506				1644.43	2.20011	2.97957e-39	2.12233e-37	RSP_7576	RSP_7576
		10.1234	-2.34189	0.0113078	0.0275098	RSP_0083	flgB				38.9764	2.18923	6.60931e-05	0.000290957	RSP_2277	RSP_2277
		21.6423	-2.34048	0.00291789	0.00846911	RSP_3282	RSP_3282				856.77	2.18905	1.21239e-27	4.70344e-26	RSP_3095	RSP_3095
		44.6135	-2.32953	6.00529e-06	3.33244e-05	RSP_2603	pstC				84.6417	2.18269	5.99964e-11	7.06462e-10	RSP_6195	RSP_6195
		18.2254	-2.31938	0.00211426	0.00636181	RSP_3280	RSP_3280				119.829	2.16531	1.71112e-15	3.05959e-14	RSP_1411	RSP_1411
		21.1755	-2.31832	3.96966e-08	3.17646e-07	RSP_2798	groEL3				214.739	2.14511	2.38096e-14	3.84582e-13	RSP_1070	RSP_1070
		132.395	-2.31241	1.03177e-12	1.45082e-11	RSP_3891	RSP_3891				160.538	2.1404	4.81775e-20	1.15017e-18	RSP_2961	RSP_2961
		233.728	-2.31178	4.21897e-21	1.06578e-19	RSP_0690	rdxI				377.532	2.13491	2.63625e-18	5.48062e-17	RSP_7392	RSP_7392
		135.071	-2.3056	7.39244e-13	1.05658e-11	RSP_2257	RSP_2257				21098.5	2.12932	1.98248e-08	1.67585e-07	RSP_4300	RSP_4300
		73.115	-2.28562	1.69161e-07	1.25214e-06	RSP_2651	RSP_2651				913.973	2.12529	4.70089e-45	4.08507e-43	RSP_1825	tldD
		239.356	-2.28297	2.75796e-23	8.26436e-22	RSP_1818	feoB				73.5971	2.11919	1.87587e-09	1.88237e-08	RSP_4278	yeaM
		13.438	-2.27153	1.374e-05	7.0819e-05	RSP_3778	RSP_3778				142.707	2.11243	1.8305e-14	3.01269e-13	RSP_0412	RSP_0412
		15.149	-2.25518	6.04801e-05	0.000268972	RSP_6166	RSP_6166				448.298	2.10624	8.66388e-24	2.66983e-22	RSP_0999	RSP_0999
		27.3987	-2.25284	2.72869e-06	1.64669e-05	RSP_4165	RSP_4165				24.5013	2.10353	8.28357e-06	4.43799e-05	RSP_3743	speB1
		476.079	-2.24098	2.39232e-53	3.14989e-51	RSP_1737	rpsM				91.1222	2.08962	2.25884e-07	1.63851e-06	RSP_7246	RSP_7246
		33.2357	-2.24076	6.53583e-16	1.22406e-14	RSP_0209	RSP_0209				33.8647	2.08128	0.00191197	0.0058054	RSP_4059	hipA
		16.0238	-2.24018	0.000467598	0.00166671	RSP_6228	RSP_6228				315.955	2.07229	3.57909e-10	3.89753e-09	RSP_6165	RSP_6165
		25.3809	-2.23738	0.000136835	0.000565696	RSP_0095	smoS				266.923	2.07108	2.55424e-22	6.93637e-21	RSP_0408	RSP_0408
		248.501	-2.23556	9.19939e-14	1.42247e-12	RSP_6237	RSP_6237				272.929	2.06626	1.55761e-31	7.51979e-30	RSP_6041	RSP_6041
		37.407	-2.23502	3.70535e-08	2.98697e-07	RSP_2833	cinA				21.5766	2.06158	0.000404164	0.00146097	RSP_3624	RSP_3624
		667.401	-2.23242	2.14251e-10	2.38087e-09	RSP_0129	metN				24.5667	2.05728	0.0058435	0.0155101	RSP_3271	rbpL
		174.523	-2.22634	1.08651e-21	2.84392e-20	RSP_0295	RSP_0295				209.247	2.05087	3.34728e-18	6.92568e-17	RSP_0576	RSP_0576
		35.3382	-2.22464	5.21192e-14	8.32565e-13	RSP_1305	RSP_1305				299.286	2.04934	6.75932e-12	8.71491e-11	RSP_7501	RSP_7501
		91.6801	-2.22071	1.37288e-10	1.57392e-09	RSP_0691	rdxH				19.3513	2.0493	0.00086205	0.00286143	RSP_2177	RSP_2177
		129.078	-2.208	2.04993e-10	2.28383e-09	RSP_1951	RSP_1951				61.6225	2.04477	2.1415e-08	1.79977e-07	RSP_3677	RSP_3677
		113.031	-2.18286	8.79997e-08	6.76741e-07	RSP_3904	traI				127.131	2.04373	9.91306e-07	6.47703e-06	RSP_0747	RSP_0747
		31.054	-2.18071	2.67332e-10	2.94065e-09	RSP_3661	RSP_3661				394.628	2.03811	1.43773e-55	2.23104e-53	RSP_3092	RSP_3092
		18.7907	-2.17862	1.66318e-05	8.42596e-05	RSP_6226	RSP_6226				123.272	2.03264	9.98994e-14	1.53923e-12	RSP_0430	cobD
		170.512	-2.16889	2.83253e-11	3.47665e-10	RSP_1525	RSP_1525				58.2273	2.02516	1.82547e-07	1.34435e-06	RSP_1521	RSP_1521
		12.4457	-2.16764	0.00485393	0.0132145	RSP_1117	RSP_1117				150.002	2.01386	3.99092e-08	3.1876e-07	RSP_1997	lexA
		311.515	-2.1669	3.06865e-16	5.82239e-15	RSP_3622	RSP_3622				166.265	2.00867	8.03662e-09	7.24463e-08	RSP_4277	RSP_4277
		10.8432	-2.15467	0.00485375	0.0132145	RSP_3517	RSP_3517				17.8394	2.00755	0.00791027	0.0201076	RSP_4132	RSP_4132
		87.8943	-2.15153	9.02918e-07	5.95323e-06	RSP_2717	RSP_2717				366.126	2.00691	7.2216e-09	6.6198e-08	RSP_2484	RSP_2484
		52.3463	-2.1513	1.05638e-08	9.3103e-08	RSP_3070	RSP_3070				274.471	2.00585	2.5235e-25	8.24406e-24	RSP_1613	RSP_1613
		64.9951	-2.15123	2.21403e-09	2.19634e-08	RSP_0790	pqqE				207.996	2.00245	1.0707e-14	1.82438e-13	RSP_0595	RSP_0595
		398.225	-2.15018	1.41008e-19	3.19103e-18	RSP_0466	RSP_0466				74.1367	2.0021	7.42088e-09	6.77227e-08	RSP_3043	RSP_3043
		104.551	-2.14995	5.33444e-08	4.22959e-07	RSP_2904	pdxA1				152.166	2.00069	2.7137e-07	1.94251e-06	RSP_7668	RSP_7668
		38.1406	-2.14906	1.17489e-09	1.20115e-08	RSP_3749	ampC				145.554	1.9969	4.82797e-06	2.74575e-05	RSP_3594	RSP_3594
		37.3197	-2.14841	5.32607e-06	2.99376e-05	RSP_0455	RSP_0455				302.644	1.99193	9.26075e-23	2.68253e-21	RSP_2219	RSP_2219
		15.626	-2.14275	0.00631637	0.0165929	RSP_2357	RSP_2357				116.022	1.98859	1.39465e-07	1.04478e-06	RSP_0702	RSP_0702
		19.8855	-2.13069	0.00996875	0.0245685	RSP_2820	cobA				471.134	1.98834	8.93379e-40	6.46956e-38	RSP_2976	RSP_2976
		65.5296	-2.12936	5.88934e-17	1.15788e-15	RSP_3566	RSP_3566				39.733	1.98456	4.90316e-05	0.000224019	RSP_2278	RSP_2278
		50.8496	-2.12594	5.57815e-09	5.17886e-08	RSP_0343	RSP_0343				979.349	1.97379	9.30446e-16	1.70582e-14	RSP_1517	spbA
		13.4874	-2.12192	0.00895665	0.0223916	RSP_0047	cheB2				1193.74	1.9704	3.45739e-28	1.36949e-26	RSP_3179	fur
		41.3845	-2.12035	3.54872e-07	2.49501e-06	RSP_3063	RSP_3063				59.5193	1.96936	0.00022166	0.000863004	RSP_3902	RSP_3902
		49.048	-2.11805	0.00882596	0.022103	RSP_1047	rimM				147.64	1.96766	5.57908e-13	8.05447e-12	RSP_2785	CycF
		16.8014	-2.11766	1.82609e-05	9.1833e-05	RSP_4167	RSP_4167				57.1683	1.96626	1.28511e-09	1.30768e-08	RSP_0520	RSP_0520
		73.7803	-2.11133	1.63696e-05	8.31884e-05	RSP_0713	RSP_0713				30.0873	1.96107	5.26393e-05	0.000238995	RSP_0540	nifD
		48.8245	-2.10457	1.93867e-08	1.64202e-07	RSP_0792	pqqC				574.165	1.95818	1.18266e-18	2.51895e-17	RSP_0672	TolQ
		15.3859	-2.10196	0.000870978	0.00288748	RSP_1876	RSP_1876				738.677	1.95505	1.44466e-08	1.25541e-07	RSP_0314	pucB
		71.3462	-2.09776	1.67088e-06	1.05762e-05	RSP_1745	RSP_1745				22.4964	1.95056	0.00150023	0.00469294	RSP_2349	RSP_2349
		26.2153	-2.09767	5.28707e-05	0.000239795	RSP_0648	thiE				151.295	1.94738	3.37589e-14	5.41264e-13	RSP_4248	RSP_4248
		21.5973	-2.09741	3.31929e-05	0.000157966	RSP_1933	RSP_1933				294.727	1.94554	2.79607e-21	7.10464e-20	RSP_2554	RSP_2554
		22.6853	-2.09573	4.10006e-05	0.000190125	RSP_6178	gpFII				207.017	1.942	8.08688e-13	1.14454e-11	RSP_6185	RSP_6185
		124.979	-2.08605	1.10446e-16	2.14236e-15	RSP_1541	RSP_1541				250.04	1.93885	8.36739e-14	1.30778e-12	RSP_0626	infA
		73.9754	-2.08547	0.000871228	0.00288748	RSP_1929	pyrE				270.95	1.92739	9.27664e-21	2.29017e-19	RSP_0156	RSP_0156
		15.6382	-2.08467	4.71193e-06	2.68679e-05	RSP_3486	RSP_3486				89.4593	1.92657	1.6658e-05	8.42596e-05	RSP_2224	RSP_2224
		16.8499	-2.08244	0.00110162	0.00356141	RSP_2029	ucpA				211.471	1.92098	8.7527e-12	1.12516e-10	RSP_4289	RSP_4289
		57.2537	-2.0824	0.000859398	0.00285487	RSP_3549	hisG				186.141	1.91783	3.62301e-06	2.11302e-05	RSP_1261	blrB
		91.8082	-2.07964	6.02277e-05	0.000268281	RSP_0963	RSP_0963				124.65	1.91699	7.32317e-08	5.70236e-07	RSP_7391	RSP_7391
		20.7878	-2.07275	0.0222905	0.0495366	RSP_3416	RSP_3416				447.154	1.91213	3.79941e-27	1.3757e-25	RSP_2710	RSP_2710
		69.4309	-2.05907	2.16104e-20	5.24566e-19	RSP_3477	RSP_3477				211.777	1.90892	1.3385e-10	1.53857e-09	RSP_0248	RSP_0248
		14.3551	-2.05702	0.00186952	0.00569241	RSP_6253	RSP_6253				215.548	1.89719	7.3972e-16	1.36769e-14	RSP_2856	RSP_2856
		32.5095	-2.05583	0.00060443	0.0020943	RSP_0034	flhA				1557.35	1.89628	1.78342e-42	1.4089e-40	RSP_1529	trxA
		45.7972	-2.05429	0.00177377	0.00543403	RSP_0349	RSP_0349				153.443	1.89595	2.65185e-11	3.2827e-10	RSP_2971	RSP_2971
		94.2155	-2.05345	1.48358e-08	1.28409e-07	RSP_2510	hmgL				80.6069	1.89569	3.15988e-05	0.000150906	RSP_0894	RSP_0894
		413.1	-2.04674	8.19879e-20	1.90501e-18	RSP_1494	RSP_1494				2195.76	1.89303	2.61864e-47	2.47348e-45	RSP_0440	sufB
		23.2411	-2.04666	4.44415e-09	4.18868e-08	RSP_3429	RSP_3429				2564.74	1.89092	7.94692e-37	5.00426e-35	RSP_0123	cerI
		69.8557	-2.04238	1.47491e-06	9.38285e-06	RSP_1664	RSP_1664				1858.73	1.88808	3.07834e-54	4.31465e-52	RSP_1889	RSP_1889
		45.4204	-2.0398	2.13374e-05	0.000106104	RSP_1256	RSP_1256				954.958	1.88242	1.57134e-25	5.21183e-24	RSP_0847	RSP_0847
		112.181	-2.03979	8.77126e-09	7.85797e-08	RSP_2258	purC1				16.3892	1.87976	0.0124488	0.0299336	RSP_1312	fliF
		91.0153	-2.03938	4.85106e-15	8.43114e-14	RSP_0236	RSP_0236				126.643	1.87648	2.73401e-06	1.64761e-05	RSP_2579	cycB
		258.662	-2.02863	4.36704e-16	8.24991e-15	RSP_0967	sucC				446.298	1.8735	5.53321e-21	1.3897e-19	RSP_6124	RSP_6124
		73.1125	-2.02312	8.18931e-10	8.49226e-09	RSP_0428	RSP_0428				1477.67	1.87114	1.01987e-30	4.66457e-29	RSP_1949	RSP_1949
		140.891	-2.02195	2.07161e-11	2.61661e-10	RSP_0193	RSP_0193				180.073	1.8688	1.59423e-09	1.61844e-08	RSP_3511	RSP_3511
		48.6432	-2.02168	0.000384219	0.00139936	RSP_2168	RSP_2168				194.143	1.86877	4.03157e-13	5.89254e-12	RSP_1592	acsA
		14.1567	-2.01919	0.00374968	0.0105932	RSP_0514	RSP_0514				54.4528	1.86842	6.09271e-08	4.77849e-07	RSP_3053	RSP_3053
		176.768	-2.01417	3.94607e-09	3.75874e-08	RSP_1484	RSP_1484				118.074	1.864	3.66242e-10	3.95851e-09	RSP_1104	RSP_1104
		18.5585	-2.01107	1.10752e-05	5.79782e-05	RSP_0941	RSP_0941				22.1422	1.85674	0.0013347	0.00422688	RSP_1142	RSP_1142
		233.169	-2.00976	1.53352e-14	2.56274e-13	RSP_1895	RSP_1895				67.2042	1.85057	7.87503e-09	7.11373e-08	RSP_3451	RSP_3451
		57.696	-2.00212	1.53927e-06	9.77796e-06	RSP_0860	RSP_0860				110.196	1.85045	4.90907e-11	5.85986e-10	RSP_3263	RSP_3263
		14.4271	-2.00138	0.000810402	0.00271488	RSP_1638	RSP_1638				389.877	1.84837	1.06401e-19	2.43321e-18	RSP_0698	fnrL
		65.7159	-2.0005	8.30631e-14	1.30292e-12	RSP_2792	RSP_2792				2208.07	1.84685	5.65126e-53	7.22197e-51	RSP_1173	dnaK
		36.9966	-1.99849	7.97328e-05	0.000346439	RSP_2720	RSP_2720				124.514	1.83644	1.14155e-06	7.392e-06	RSP_2888	RSP_2888
		35.0057	-1.99351	0.00014847	0.000607442	RSP_1296	nagA				181.114	1.83594	6.40555e-14	1.01577e-12	RSP_0296	cycA
		12.8622	-1.98546	0.00753371	0.019278	RSP_4108	wcaG				100.981	1.83316	6.2256e-08	4.86515e-07	RSP_2363	RSP_2363
		44.0171	-1.98528	8.21456e-10	8.49816e-09	RSP_2183	betB				107.025	1.82581	1.37749e-07	1.03371e-06	RSP_3433	RSP_3433
		7623.13	-1.98147	3.18747e-17	6.35301e-16	RSP_4335	RSP_4335				121.111	1.82451	5.70535e-10	6.00236e-09	RSP_3859	RSP_3859
		117.793	-1.98001	0.000149813	0.000610634	RSP_2347	RSP_2347				20.1849	1.81386	0.00709081	0.0183281	RSP_3790	RSP_3790
		159.822	-1.9793	6.52047e-05	0.000288214	RSP_3720	RSP_3720				261.08	1.81114	2.8545e-13	4.19014e-12	RSP_0704	RSP_0704
		1079.05	-1.96628	1.18252e-32	6.26594e-31	RSP_2174	RSP_2174				60.9154	1.81048	0.000316415	0.00117406	RSP_4224	traB
		14.5792	-1.96477	0.000213322	0.000834277	RSP_2795	RSP_2795				556.927	1.80983	2.89062e-16	5.50866e-15	RSP_3476	RSP_3476
		14.588	-1.95963	0.000439967	0.00158119	RSP_1303	flgE1				23.5777	1.80483	0.00155156	0.00484304	RSP_3783	RSP_3783
		420.164	-1.95391	1.35047e-19	3.07214e-18	RSP_0699	hemZ				116.336	1.80236	4.78024e-09	4.48599e-08	RSP_2751	RSP_2751
		187.785	-1.95359	1.50751e-12	2.07283e-11	RSP_3557	RSP_3557				53.7891	1.79615	9.62474e-06	5.10616e-05	RSP_0594	RSP_0594
		26.3251	-1.94789	5.98531e-07	4.08902e-06	RSP_2559	RSP_2559				119.005	1.78878	9.55683e-05	0.000409108	RSP_1085	RSP_1085
		54.7727	-1.94113	0.000113343	0.000476283	RSP_2249	RSP_2249				287.22	1.78235	1.71372e-26	5.95688e-25	RSP_1139	RSP_1139
		157.428	-1.93178	6.08759e-11	7.14881e-10	RSP_0106	nuoH1				233.58	1.76888	1.21159e-07	9.15541e-07	RSP_4081	RSP_4081
		67.7943	-1.93168	0.00262423	0.00768581	RSP_2109	RSP_2109				172.066	1.76062	3.90143e-07	2.72535e-06	RSP_2093	RSP_2093
		12.0649	-1.9262	0.00313092	0.00901514	RSP_3921	RSP_3921				240.551	1.75666	1.38414e-12	1.91532e-11	RSP_1984	RSP_1984
		435.215	-1.92577	6.84755e-44	5.6137e-42	RSP_1994	gltA				51.3483	1.75603	0.00509552	0.013743	RSP_2075	RSP_2075
		260.06	-1.91969	2.04723e-36	1.25285e-34	RSP_1567	RSP_1567				890.313	1.75331	1.06316e-21	2.79965e-20	RSP_2658	RSP_2658
		13.4368	-1.91738	0.000119085	0.000498483	RSP_1848	RSP_1848				41.112	1.75176	0.00113693	0.00366196	RSP_1536	RSP_1536
		185.043	-1.91718	5.27107e-22	1.42253e-20	RSP_1018	RSP_1018				148.473	1.74745	2.18973e-08	1.83321e-07	RSP_2674	RSP_2674
		505.333	-1.91483	1.43187e-26	5.01733e-25	RSP_2536	rhlE				275.427	1.74211	3.0381e-17	6.0832e-16	RSP_3383	RSP_3383
		96.3929	-1.91084	3.81655e-06	2.20456e-05	RSP_2918	RSP_2918				106.907	1.74038	1.97879e-06	1.23888e-05	RSP_2085	RSP_2085
		26.9604	-1.90501	1.3864e-08	1.21206e-07	RSP_6099	RSP_6099				112.677	1.7376	1.50066e-05	7.64404e-05	RSP_2683	RSP_2683
		477.137	-1.89869	2.18869e-20	5.28326e-19	RSP_0317	hemN				51.4515	1.73704	1.75676e-05	8.85511e-05	RSP_7203	RSP_7203
		192.018	-1.89769	1.82897e-09	1.83956e-08	RSP_0465	RSP_0465				1362.23	1.73552	6.96834e-48	6.88124e-46	RSP_4193	RSP_4193
		47.8264	-1.89301	6.20102e-08	4.85467e-07	RSP_3431	RSP_3431				846.147	1.73491	9.82729e-24	2.98598e-22	RSP_7577	RSP_7577
		37.9166	-1.8917	7.99932e-07	5.31453e-06	RSP_2933	hutF				95.4786	1.72813	2.23613e-05	0.000110283	RSP_2419	RSP_2419
		69.2586	-1.89111	0.000136996	0.000565826	RSP_1910	RSP_1910				177.497	1.72657	1.03867e-07	7.94546e-07	RSP_4161	RSP_4161
		75.817	-1.88871	1.44865e-08	1.25637e-07	RSP_3546	RSP_3546				72.2946	1.72486	0.000102984	0.000437832	RSP_2086	RSP_2086
		24.7308	-1.88811	0.00638768	0.0167397	RSP_0045	slp				132.6	1.72264	3.00999e-08	2.47686e-07	RSP_2225	RSP_2225
		19.1575	-1.88751	0.00550744	0.014726	RSP_0997	phaG				77.7784	1.72081	0.000390556	0.00142006	RSP_2659	dgt
		52.3123	-1.8856	1.64868e-08	1.41292e-07	RSP_6020	feoA2				85.8101	1.71262	8.31976e-06	4.45189e-05	RSP_6257	RSP_6257
		43.4335	-1.87431	3.69481e-07	2.59353e-06	RSP_3487	RSP_3487				557.828	1.70564	5.7254e-20	1.34469e-18	RSP_0250	RSP_0250
		114.79	-1.86433	0.00228259	0.0068211	RSP_3642	exsB				26.2461	1.70075	0.00143458	0.00450706	RSP_2231	RSP_2231
		24.8593	-1.86325	0.000206426	0.000812429	RSP_1583	cheY3				267.208	1.69726	8.91773e-16	1.64184e-14	RSP_6078	RSP_6078
		18.3549	-1.86196	0.002192	0.00657299	RSP_3439	RSP_3439				578.285	1.6942	3.52778e-27	1.29937e-25	RSP_2024	cspA
		56.0131	-1.85998	1.49674e-05	7.63303e-05	RSP_0566	RSP_0566				105	1.69406	1.6903e-08	1.4429e-07	RSP_3601	RSP_3601
		442.007	-1.85612	2.34212e-11	2.92428e-10	RSP_0910	dctP				47.4656	1.6931	3.11174e-05	0.000149068	RSP_1615	RSP_1615
		368.468	-1.84683	7.35404e-13	1.05456e-11	RSP_2148	RSP_2148				314.09	1.68988	6.30735e-12	8.20523e-11	RSP_2641	RSP_2641
		57.3873	-1.84625	3.89753e-05	0.000182094	RSP_4084	RSP_4084				279.767	1.68458	1.39302e-22	3.93031e-21	RSP_2213	RSP_2213
		42.8728	-1.8392	1.04051e-08	9.20776e-08	RSP_1454	RSP_1454				525.973	1.68264	7.10718e-33	3.81243e-31	RSP_1573	RSP_1573
		12.9271	-1.83619	0.000441833	0.00158658	RSP_2932	hutC				160.933	1.67782	6.58049e-20	1.53722e-18	RSP_1425	RSP_1425
		42.994	-1.834	6.36612e-07	4.322e-06	RSP_0218	mcpM				33646	1.67412	1.78088e-13	2.65908e-12	RSP_4319	RSP_4319
		113.366	-1.83305	5.88174e-13	8.46231e-12	RSP_1205	RSP_1205				43.6515	1.67249	0.00426463	0.0118326	RSP_1403	RSP_1403
		71.2831	-1.83206	4.1585e-07	2.89562e-06	RSP_2205	RSP_2205				174.294	1.67235	2.03684e-07	1.48491e-06	RSP_2189	pccB
		23.2864	-1.83074	1.15421e-05	6.00606e-05	RSP_2793	RSP_2793				21.8887	1.66841	0.0130555	0.0311681	RSP_0610	RSP_0610
		30.0684	-1.83026	2.75174e-05	0.000132848	RSP_3268	tklB				75.459	1.6672	0.000478457	0.00170122	RSP_7530	RSP_7530
		54.5894	-1.82315	4.75348e-06	2.70693e-05	RSP_0201	RSP_0201				388.16	1.66521	3.4149e-27	1.27911e-25	RSP_2637	RSP_2637
		57.071	-1.81541	2.24485e-05	0.000110463	RSP_3605	RSP_3605				390.389	1.65873	2.04705e-21	5.23202e-20	RSP_2952	RSP_2952
		89.7509	-1.81511	2.15828e-06	1.3273e-05	RSP_1170	RSP_1170				79.3592	1.65019	5.02539e-10	5.33871e-09	RSP_0961	MeaA
		49.7155	-1.81097	0.00166309	0.00513218	RSP_1932	RSP_1932				3957.7	1.64246	5.80528e-30	2.54787e-28	RSP_1548	RSP_1548
		10.1713	-1.80973	0.00213129	0.00640862	RSP_3764	RSP_3764				762.27	1.63235	1.38303e-22	3.92762e-21	RSP_2106	ftsW
		49.2495	-1.80925	4.49272e-07	3.10842e-06	RSP_0592	RSP_0592				61.7145	1.63012	1.01148e-05	5.34656e-05	RSP_6227	RSP_6227
		52.9239	-1.8051	3.90788e-12	5.17675e-11	RSP_0308	ureB				685.743	1.62989	5.30929e-39	3.72078e-37	RSP_2214	RSP_2214
		43.9508	-1.79983	0.000403835	0.00146097	RSP_3132	RSP_3132				25.775	1.6261	0.00854267	0.0215301	RSP_0947	RSP_0947
		120.016	-1.79947	5.99019e-08	4.7151e-07	RSP_2520	RSP_2520				66.9335	1.61889	6.07873e-05	0.000270062	RSP_3205	RSP_3205
		103.218	-1.79853	1.35381e-13	2.04958e-12	RSP_1190	RSP_1190				553.562	1.61763	2.11774e-22	5.86088e-21	RSP_1880	RSP_1880
		93.614	-1.79753	5.87017e-11	6.94983e-10	RSP_1013	RSP_1013				343.288	1.61747	1.66084e-08	1.42054e-07	RSP_7711	RSP_7711
		163.005	-1.79591	1.07299e-12	1.50391e-11	RSP_0774	RSP_0774				193.664	1.59793	4.11679e-10	4.41666e-09	RSP_3324	RSP_3324
		140.236	-1.7959	2.79433e-11	3.43948e-10	RSP_1905	RSP_1905				260.207	1.59698	1.28873e-13	1.95788e-12	RSP_3093	RSP_3093
		39.1724	-1.79437	7.3089e-08	5.70147e-07	RSP_1189	wcaJ				370.53	1.5949	5.71346e-25	1.82537e-23	RSP_1551	RSP_1551
		397.096	-1.79308	2.97067e-09	2.89407e-08	RSP_1987	RSP_1987				29.5564	1.59424	0.0186638	0.0425244	RSP_0302	ureG
		63.2709	-1.79156	3.04258e-12	4.06769e-11	RSP_7536	RSP_7536				100.818	1.59177	0.000145455	0.000596789	RSP_1577	putR
		35.592	-1.7889	0.000308811	0.00114682	RSP_1392	thiP				161.65	1.59146	0.00326972	0.00936355	RSP_1962	RSP_1962
		64.4056	-1.78539	0.000117586	0.000493159	RSP_1510	RSP_1510				95.5389	1.5892	3.46324e-07	2.44282e-06	RSP_1458	RSP_1458
		16.6071	-1.78484	4.15941e-05	0.000192467	RSP_2067	RSP_2067				489.667	1.58674	1.37949e-30	6.17925e-29	RSP_1076	sohB
		129.781	-1.78199	4.85935e-09	4.5504e-08	RSP_0432	RSP_0432				133.595	1.5863	0.00012958	0.000539296	RSP_1472	RSP_1472
		184.912	-1.77405	5.68561e-10	5.99612e-09	RSP_2525	nuoJ				272.631	1.58497	1.02889e-13	1.57413e-12	RSP_0625	RSP_0625
		11.2503	-1.76847	0.00548871	0.014685	RSP_3144	RSP_3144				287249	1.58472	4.04137e-13	5.89254e-12	RSP_4299	RSP_4299
		11.9626	-1.7681	0.0218373	0.0486192	RSP_0043	cheY6				76.7387	1.58013	5.04703e-06	2.85911e-05	RSP_1844	RSP_1844
		295.899	-1.76788	2.83727e-12	3.80492e-11	RSP_1740	rplQ				209.304	1.57632	6.72776e-07	4.53915e-06	RSP_0380	RSP_0380
		65.7463	-1.76683	8.54879e-06	4.56321e-05	RSP_1862	RSP_1862				168.664	1.56744	3.11868e-05	0.000149236	RSP_2986	RSP_2986
		181.264	-1.76667	0.000455383	0.00162985	RSP_2289	RSP_2289				1637.37	1.56503	4.81829e-32	2.463e-30	RSP_4242	RSP_4242
		151.153	-1.76411	0.000201305	0.000795154	RSP_1153	GutQ				444.205	1.56404	5.09434e-20	1.20956e-18	RSP_1840	RSP_1840
		17.3515	-1.76375	0.00133116	0.00421874	RSP_3047	dorB				237.311	1.56162	6.16193e-14	9.80717e-13	RSP_0663	RSP_0663
		54.881	-1.76273	3.12074e-06	1.84988e-05	RSP_1247	RSP_1247				474.931	1.55743	7.13605e-16	1.32505e-14	RSP_2955	RSP_2955
		29.6443	-1.76263	0.0215685	0.048133	RSP_0037	flgM				262.231	1.55638	2.09847e-12	2.84932e-11	RSP_1628	RSP_1628
		34.6405	-1.76205	2.69602e-06	1.62923e-05	RSP_4114	napF				74.25	1.55568	8.68139e-05	0.00037533	RSP_1415	RSP_1415
		46.411	-1.76158	0.00124883	0.00398689	RSP_2287	RSP_2287				154.467	1.55478	0.00774292	0.0197319	RSP_2310	groES
		38.1486	-1.76096	0.0228247	0.0503418	RSP_0977	RSP_0977				157.114	1.55324	1.15248e-07	8.73916e-07	RSP_3917	rkpT1
		15.9238	-1.76029	0.0223762	0.049643	RSP_0736	mobC				124.311	1.54897	3.06956e-05	0.00014721	RSP_3922	RSP_3922
		77.3705	-1.75798	5.89991e-06	3.28655e-05	RSP_0734	RSP_0734				161.286	1.54646	2.00654e-09	1.99963e-08	RSP_2206	RSP_2206
		25.5141	-1.75492	0.0106224	0.026017	RSP_1936	RSP_1936				119.113	1.54355	6.10637e-10	6.39329e-09	RSP_1671	RSP_1671
		91.9885	-1.75242	1.03741e-10	1.20522e-09	RSP_2239	RSP_2239				711.974	1.54275	7.36938e-30	3.17029e-28	RSP_1572	RSP_1572
		290.641	-1.75093	2.53778e-11	3.15047e-10	RSP_2895	RSP_2895				201.698	1.54268	2.66614e-05	0.000129146	RSP_3142	actP
		4108.09	-1.74755	1.30341e-06	8.37768e-06	RSP_1711	RSP_1711				792.195	1.54189	1.89354e-22	5.30803e-21	RSP_1852	RSP_1852
		20.3242	-1.74106	0.000186531	0.000742197	RSP_1063	RSP_1063				41.855	1.54152	0.00487574	0.0132656	RSP_3805	RSP_3805
		16.3485	-1.73833	0.000322611	0.00119501	RSP_6032	RSP_6032				31.9623	1.54005	0.000194879	0.000772582	RSP_1608	RSP_1608
		78.113	-1.73697	2.7585e-05	0.00013301	RSP_2623	recG				177.58	1.53899	2.22079e-08	1.85564e-07	RSP_4238	traG
		12.8766	-1.73685	9.38124e-05	0.00040318	RSP_6182	RSP_6182				207.589	1.53821	5.98179e-09	5.52997e-08	RSP_1362	RSP_1362
		21.9645	-1.73669	0.000544138	0.00190822	RSP_7394	RSP_7394				208.323	1.53811	1.99991e-07	1.46289e-06	RSP_0668	RSP_0668
		56.8643	-1.73206	0.000481084	0.00170917	RSP_1589	tlpC				361.103	1.53522	3.75073e-11	4.55222e-10	RSP_4047	pdhAa
		295.951	-1.73099	6.53087e-22	1.7409e-20	RSP_1703	rplK				316.041	1.53442	1.5572e-17	3.17654e-16	RSP_0011	RSP_0011
		19.2957	-1.73094	0.00120013	0.00383989	RSP_0321	norD				121.789	1.5308	1.31864e-05	6.8208e-05	RSP_0009	RSP_0009
		237.26	-1.72935	7.97803e-13	1.13654e-11	RSP_0254	dxsA				176.541	1.53007	2.4433e-07	1.76055e-06	RSP_2480	RSP_2480
		24.9733	-1.72847	0.000953799	0.00313484	RSP_0318	RSP_0318				211.763	1.52964	8.20267e-06	4.40551e-05	RSP_2950	RSP_2950
		82.3995	-1.72825	1.8138e-14	3.008e-13	RSP_3869	modC				127.568	1.52932	5.04269e-05	0.00022967	RSP_3185	cobB
		104.857	-1.72767	3.70587e-10	3.99554e-09	RSP_3236	RSP_3236				118.949	1.52748	0.0016821	0.0051835	RSP_3825	RSP_3825
		79.2211	-1.72405	2.33897e-12	3.15615e-11	RSP_1244	RSP_1244				88.3903	1.52429	0.000834453	0.00278044	RSP_1566	RSP_1566
		69.7007	-1.72139	0.000947216	0.00311792	RSP_1908	RSP_1908				93.1891	1.52022	4.29025e-05	0.000198099	RSP_1683	RSP_1683
		64.3307	-1.71442	7.06125e-07	4.73474e-06	RSP_1373	RSP_1373				137.999	1.51936	1.99257e-11	2.52411e-10	RSP_7519	RSP_7519
		10.4459	-1.71317	0.00310865	0.00895694	RSP_4053	xanB				493.239	1.51378	7.96439e-05	0.000346399	RSP_1038	atpB
		21.5794	-1.71228	0.0146438	0.0344489	RSP_2889	RSP_2889				632.401	1.50937	3.63413e-15	6.36706e-14	RSP_2968	RSP_2968
		58.7912	-1.70859	0.00585784	0.0155387	RSP_0374	RSP_0374				373.759	1.50582	5.86662e-11	6.94983e-10	RSP_3094	RSP_3094
		10.7354	-1.70549	0.0171017	0.0394828	RSP_0496	hupL				76.7597	1.50411	0.000326941	0.00120796	RSP_3337	RSP_3337
		15.3003	-1.70304	0.00315584	0.00908089	RSP_1118	RSP_1118				243.976	1.50332	6.55184e-05	0.000289013	RSP_0240	pntA
		96.4243	-1.70252	3.12594e-07	2.21932e-06	RSP_0701	RSP_0701				56.8627	1.50225	3.5011e-05	0.000165531	RSP_0752	RSP_0752
		31.0292	-1.69612	0.0165157	0.0383132	RSP_1800	RSP_1800				828.333	1.5022	2.25709e-16	4.32029e-15	RSP_1489	RSP_1489
		22.0068	-1.69594	0.0159916	0.0372367	RSP_3906	RSP_3906				156.711	1.4997	2.39273e-07	1.73273e-06	RSP_2163	RSP_2163
		14.1809	-1.69398	0.0180808	0.041348	RSP_0337	RSP_0337				151.816	1.49868	2.74431e-09	2.69165e-08	RSP_3042	dorX
		119.296	-1.69205	3.95709e-11	4.76275e-10	RSP_0597	RSP_0597				898.928	1.49655	2.22081e-22	6.06881e-21	RSP_6229	RSP_6229
		21.0983	-1.69203	0.00236608	0.00703398	RSP_0076	flgI				133.175	1.48965	9.06804e-13	1.27924e-11	RSP_0519	RSP_0519
		19.359	-1.69076	1.33944e-05	6.91194e-05	RSP_3427	RSP_3427				47.8882	1.48939	0.00117376	0.00376384	RSP_0724	mscL
		105.922	-1.68988	2.60052e-08	2.14815e-07	RSP_2147	cysK				357.448	1.48863	1.59164e-12	2.1816e-11	RSP_0379	RSP_0379
		109.128	-1.68964	0.00187399	0.00570201	RSP_1110	RSP_1110				797.585	1.47878	4.67339e-32	2.42763e-30	RSP_1549	RSP_1549
		81.9481	-1.67897	2.5239e-05	0.000123079	RSP_0140	rpsR				1805.24	1.47788	3.13842e-59	5.92889e-57	RSP_2948	RSP_2948
		29.5202	-1.67545	6.45673e-06	3.55163e-05	RSP_2797	RSP_2797				356.515	1.47775	1.1014e-10	1.27276e-09	RSP_7520	RSP_7520
		11.03	-1.67464	0.00655602	0.0171189	RSP_3285	iolE				25.3586	1.47731	0.00243682	0.00723223	RSP_3410	RSP_3410
		93.9025	-1.67417	5.84322e-08	4.60777e-07	RSP_3051	RSP_3051				77.5103	1.47622	3.6044e-05	0.00016986	RSP_2389	RSP_2389
		263.273	-1.66942	1.04102e-05	5.47607e-05	RSP_3644	RSP_3644				49.3677	1.47557	0.000450911	0.00161518	RSP_0303	ureF
		161.213	-1.66894	8.55516e-14	1.33234e-12	RSP_1983	sqdA				343.888	1.47556	9.30886e-09	8.27137e-08	RSP_0371	RSP_0371
		173.272	-1.66843	1.8502e-11	2.35751e-10	RSP_1811	glnD				88.9715	1.47375	3.46152e-06	2.03523e-05	RSP_6224	RSP_6224
		179.507	-1.66751	8.97515e-06	4.78491e-05	RSP_0282	ppsR				39.783	1.46649	0.000377263	0.00137633	RSP_2782	aqpZ
		810.231	-1.66456	2.0917e-18	4.41185e-17	RSP_2299	atpD				1090.44	1.46563	3.57757e-37	2.32008e-35	RSP_0442	RSP_0442
		42.8285	-1.66439	0.00519294	0.0139624	RSP_1132	RSP_1132				568.841	1.46345	6.94774e-19	1.51698e-17	RSP_4049	pdhAb
		343.522	-1.66097	1.19774e-12	1.67337e-11	RSP_1860	RSP_1860				75.8516	1.46218	4.61121e-06	2.63628e-05	RSP_1988	RSP_1988
		17.7301	-1.65656	0.00154122	0.00481425	RSP_0614	RSP_0614				186.17	1.46059	4.03458e-12	5.32834e-11	RSP_1138	RSP_1138
		63.6741	-1.65652	2.30881e-05	0.000113354	RSP_1612	RSP_1612				585.877	1.46044	3.67921e-29	1.50813e-27	RSP_2481	cysE
		73.5098	-1.65528	0.00127569	0.0040637	RSP_1006	RSP_1006				193.724	1.45977	2.46554e-08	2.04055e-07	RSP_0124	RSP_0124
		86.5009	-1.65497	2.23064e-06	1.36509e-05	RSP_0074	flgK1				1920.16	1.45737	6.20128e-53	7.69845e-51	RSP_1408	clpB
		58.2455	-1.65323	1.66503e-05	8.42596e-05	RSP_2645	eda				698.607	1.45647	2.88756e-24	9.02622e-23	RSP_3599	RSP_3599
		34.5881	-1.6517	0.0242443	0.0531224	RSP_2352	RSP_2352				441.922	1.44888	1.95551e-14	3.19424e-13	RSP_1882	RSP_1882
		24.4155	-1.64763	7.02518e-05	0.00030768	RSP_6114	RSP_6114				143.103	1.44813	3.59125e-10	3.901e-09	RSP_1259	RSP_1259
		65.9559	-1.64745	0.000458231	0.00163735	RSP_3725	RSP_3725				121.175	1.44357	0.00748624	0.0191678	RSP_2015	argK
		43.1998	-1.64609	0.0130338	0.0311335	RSP_1506	RSP_1506				111.58	1.44311	1.59685e-08	1.37549e-07	RSP_0985	RSP_0985
		46.0676	-1.64564	1.58934e-07	1.18451e-06	RSP_3380	RSP_3380				1604.95	1.43805	4.5618e-24	1.41579e-22	RSP_1700	rplL
		58.3087	-1.64129	0.0120398	0.0290628	RSP_1066	RSP_1066				61.641	1.43569	7.8405e-05	0.000341352	RSP_4201	RSP_4201
		186.535	-1.6396	2.41414e-07	1.74533e-06	RSP_0464	RSP_0464				407.451	1.43234	8.4342e-15	1.44848e-13	RSP_0110	nuoL1
		436.434	-1.63778	6.77038e-07	4.56082e-06	RSP_3667	RSP_3667				15.2465	1.42999	0.0138247	0.0327526	RSP_1122	RSP_1122
		61.6209	-1.6335	0.000983012	0.00321669	RSP_4274	fecR				324.351	1.4297	3.26338e-07	2.30935e-06	RSP_6022	RSP_6022
		52.0283	-1.6316	0.00105984	0.00344171	RSP_3113	dadA1				117.198	1.42882	4.17394e-07	2.90173e-06	RSP_3519	RSP_3519
		110.435	-1.62648	7.16263e-07	4.79532e-06	RSP_1856	glyQ				664.113	1.42419	1.17083e-18	2.50603e-17	RSP_2124	RSP_2124
		52.5167	-1.62477	9.51877e-05	0.000408283	RSP_2450	RSP_2450				303.603	1.42295	2.17738e-06	1.33626e-05	RSP_2344	fabI1
		53.3976	-1.62148	0.00415184	0.0115417	RSP_1357	RSP_1357				1035.81	1.42205	1.20121e-18	2.54598e-17	RSP_1948	RSP_1948
		481.329	-1.61716	1.24873e-12	1.73901e-11	RSP_0764	RSP_0764				101.884	1.42007	4.05357e-12	5.3372e-11	RSP_1834	RSP_1834
		144.308	-1.61309	5.24692e-10	5.56045e-09	RSP_2502	glmS				71.4312	1.41833	0.00803875	0.020414	RSP_2891	RSP_2891
		44.4349	-1.61175	0.010508	0.0257805	RSP_2823	cobL				216.217	1.40897	3.60537e-10	3.90656e-09	RSP_2388	RSP_2388
		37.2335	-1.61053	0.0095964	0.0237857	RSP_3391	RSP_3391				827.755	1.40326	2.39119e-17	4.81006e-16	RSP_2693	RSP_2693
		20.8883	-1.60826	0.000878486	0.0029071	RSP_3127	arsC				550.463	1.40128	3.0866e-08	2.52566e-07	RSP_1201	RSP_1201
		36.4794	-1.60693	0.00259979	0.00762734	RSP_2243	hisA				71.9132	1.40057	2.66811e-06	1.61461e-05	RSP_2849	RSP_2849
		32.073	-1.60691	0.0026912	0.00786329	RSP_2731	ArsH				376.863	1.39913	1.37915e-08	1.20815e-07	RSP_2562	exoM
		1464.07	-1.60421	2.50765e-13	3.70603e-12	RSP_0280	bchJ				168.288	1.39828	4.35202e-10	4.64876e-09	RSP_7387	RSP_7387
		78.9761	-1.60408	3.67379e-08	2.96703e-07	RSP_1094	RSP_1094				59.6962	1.39796	0.000218875	0.000853691	RSP_0304	ureE
		287.259	-1.60328	4.80641e-26	1.63155e-24	RSP_0460	RSP_0460				180.034	1.39773	3.37914e-07	2.38737e-06	RSP_1776	greA
		105.303	-1.60206	5.30328e-05	0.000240138	RSP_1810	mviN				131.96	1.39758	2.4346e-07	1.7572e-06	RSP_1759	RSP_1759
		50.0587	-1.60196	1.99083e-05	9.98863e-05	RSP_4210	RSP_4210				618.31	1.39729	8.49578e-20	1.96352e-18	RSP_1877	coxI
		55.3376	-1.59834	0.00018245	0.000729966	RSP_1597	add				15.0891	1.3972	0.0120813	0.0291305	RSP_3888	fabG
		66.8886	-1.59815	0.000617769	0.00213442	RSP_1128	dapE				363.018	1.39652	6.42745e-16	1.20897e-14	RSP_2130	RSP_2130
		35.1102	-1.59742	0.000418074	0.0015075	RSP_2227	glgC				83.4992	1.39279	0.000212918	0.000833451	RSP_3124	RSP_3124
		64.6248	-1.5928	2.29168e-05	0.00011264	RSP_3249	RSP_3249				77.5113	1.39092	2.2389e-05	0.000110295	RSP_0145	RSP_0145
		43.7045	-1.58795	8.99919e-05	0.000388683	RSP_1294	RSP_1294				295.251	1.38468	3.87177e-05	0.000181086	RSP_1377	RSP_1377
		73.0108	-1.58631	1.11017e-07	8.44779e-07	RSP_0875	fmt				142.497	1.3798	4.64009e-09	4.3639e-08	RSP_1058	RSP_1058
		144.135	-1.58358	4.74931e-11	5.68772e-10	RSP_1301	RSP_1301				57.1509	1.37826	0.000983424	0.00321669	RSP_1965	RSP_1965
		61.0594	-1.57382	0.000617976	0.00213442	RSP_2128	purQ				28.6683	1.37712	0.00360882	0.0102352	RSP_2350	RSP_2350
		63.6754	-1.57072	0.00138955	0.00437823	RSP_1278	cbbZ				337.319	1.37515	2.9122e-10	3.18729e-09	RSP_1220	hrcA
		68.4971	-1.56834	5.81309e-06	3.24235e-05	RSP_2212	rimI				60.3085	1.37463	0.000824977	0.00275733	RSP_3864	RSP_3864
		36.7094	-1.567	0.00168003	0.00518079	RSP_1888	RSP_1888				262.242	1.37298	0.000142146	0.000585424	RSP_2687	fbcQ
		23.7841	-1.56474	9.0527e-07	5.9597e-06	RSP_1648	RSP_1648				289.603	1.37289	1.31603e-11	1.68677e-10	RSP_1622	RSP_1622
		16.2844	-1.56392	0.00534162	0.0143215	RSP_0635	RSP_0635				148.655	1.37148	6.5674e-06	3.60295e-05	RSP_1148	RSP_1148
		122.122	-1.56235	1.06103e-05	5.56115e-05	RSP_0806	DppB				113.579	1.37137	0.0026142	0.00766444	RSP_1131	dapD
		34.6599	-1.56174	0.0017087	0.00525799	RSP_0944	purU				143.732	1.36422	4.0983e-07	2.85828e-06	RSP_0415	RSP_0415
		20.8134	-1.56074	2.48314e-05	0.0001215	RSP_3867	RSP_3867				72.6216	1.36288	2.37906e-06	1.44979e-05	RSP_3307	RSP_3307
		41.984	-1.56007	0.0161293	0.037497	RSP_3804	RSP_3804				16448.7	1.36212	5.57331e-05	0.000250684	RSP_4321	RSP_4321
		12.556	-1.55841	0.000742956	0.00252002	RSP_4115	napD				127.385	1.36202	1.63766e-10	1.85787e-09	RSP_2766	RSP_2766
		263.227	-1.55661	1.59867e-08	1.37549e-07	RSP_0261	bchY				90.7161	1.35583	1.77289e-05	8.92606e-05	RSP_0175	RSP_0175
		233.261	-1.55483	1.79355e-15	3.19384e-14	RSP_2629	gid				48.7912	1.35342	2.19907e-06	1.34767e-05	RSP_1607	RSP_1607
		122.417	-1.54232	2.0352e-07	1.48491e-06	RSP_0393	RSP_0393				811.683	1.35252	9.29153e-09	8.27137e-08	RSP_0554	htpx
		22.033	-1.54201	8.26581e-05	0.000358791	RSP_3524	RSP_3524				68.8319	1.35035	0.00108902	0.00352591	RSP_6218	RSP_6218
		158.09	-1.53941	0.00075034	0.0025411	RSP_1152	rnd1				48.9808	1.34772	0.000169376	0.000682688	RSP_2600	phoU
		18.4963	-1.53812	0.0176813	0.0405839	RSP_0340	RSP_0340				32.8289	1.34038	0.00105951	0.00344171	RSP_2741	RSP_2741
		53.427	-1.52913	0.00159588	0.00496357	RSP_4200	RSP_4200				42.052	1.3395	0.00096944	0.00318143	RSP_2070	RSP_2070
		42.3754	-1.52758	0.000482887	0.00171417	RSP_0854	RSP_0854				48.3307	1.33735	0.000597517	0.00207531	RSP_3338	RSP_3338
		40.1735	-1.52652	0.000732097	0.00248707	RSP_1842	RSP_1842				430.104	1.3373	2.13402e-11	2.67985e-10	RSP_3925	RSP_3925
		82.4757	-1.51805	2.97575e-07	2.11961e-06	RSP_4202	RSP_4202				152.576	1.33648	0.00029922	0.0011179	RSP_2402	RSP_2402
		47.9525	-1.51664	0.0124197	0.0298803	RSP_2325	rodA				53.8491	1.33386	0.000294115	0.00109977	RSP_7508	RSP_7508
		21.6978	-1.51197	0.00556569	0.0148635	RSP_7361	RSP_7361				209.389	1.33374	7.22718e-07	4.83109e-06	RSP_0908	sitD
		37.1135	-1.50993	1.33454e-05	6.89487e-05	RSP_1345	RSP_1345				167.455	1.33292	3.97126e-06	2.28545e-05	RSP_0269	tspO
		65.5408	-1.50746	1.51638e-05	7.71508e-05	RSP_1108	truB				288.953	1.32888	3.90431e-11	4.71232e-10	RSP_2640	RSP_2640
		154.125	-1.50639	6.87908e-15	1.1861e-13	RSP_0643	RSP_0643				56.6984	1.32544	0.00600578	0.0158633	RSP_3290	ugpB
		37.4933	-1.50539	5.64517e-05	0.000253653	RSP_3251	RSP_3251				70.3466	1.32539	2.13117e-05	0.000106104	RSP_1945	RSP_1945
		50.7697	-1.50481	0.00258379	0.00760957	RSP_2589	RSP_2589				212.461	1.32345	4.33707e-09	4.10557e-08	RSP_1890	RSP_1890
		119.94	-1.50418	3.01705e-08	2.47686e-07	RSP_2916	RSP_2916				536.423	1.32311	9.35895e-16	1.7086e-14	RSP_1684	RSP_1684
		45.6992	-1.5037	0.00161461	0.0050039	RSP_0364	RSP_0364				228.098	1.31874	6.93397e-07	4.65659e-06	RSP_1672	pdxJ
		144.813	-1.50302	4.75176e-11	5.68772e-10	RSP_1107	RSP_1107				93.662	1.31589	2.98861e-05	0.000143645	RSP_1295	RSP_1295
		129.775	-1.49716	1.49456e-05	7.63088e-05	RSP_2838	ntrC				93.2769	1.30829	0.000150473	0.000612749	RSP_7280	RSP_7280
		65.6435	-1.49688	0.00166114	0.00512983	RSP_1405	RSP_1405				361.506	1.30651	2.31822e-09	2.28924e-08	RSP_1826	coxII
		35.5122	-1.49673	0.0016015	0.00497747	RSP_3930	atpC-1				257.199	1.3062	6.33607e-09	5.83267e-08	RSP_1869	RSP_1869
		24.3474	-1.49446	0.000235946	0.000912087	RSP_2679	RSP_2679				360.869	1.30606	4.53007e-13	6.58299e-12	RSP_4284	RSP_4284
		77.833	-1.49325	7.15193e-05	0.000312313	RSP_3727	RSP_3727				13.5002	1.30362	0.0172615	0.0397673	RSP_2750	RSP_2750
		157.135	-1.49027	0.00039404	0.00143033	RSP_1046	RSP_1046				428.533	1.30355	3.72023e-09	3.57619e-08	RSP_2330	leuA
		92.1227	-1.48938	0.00675862	0.017553	RSP_2455	RSP_2455				109.665	1.29783	1.05117e-05	5.51612e-05	RSP_1147	RSP_1147
		164.01	-1.48931	1.91308e-11	2.43051e-10	RSP_1665	RSP_1665				117.13	1.29678	3.77821e-06	2.18593e-05	RSP_0682	hemF
		172.987	-1.48781	2.79369e-05	0.000134425	RSP_1255	RSP_1255				164.624	1.29661	0.00101327	0.00330034	RSP_3757	RSP_3757
		30.4861	-1.48398	0.00148688	0.00465791	RSP_3436	RSP_3436				128.367	1.29593	1.17021e-08	1.02926e-07	RSP_3041	RSP_3041
		18.6994	-1.48312	0.000225158	0.000873493	RSP_2944	RSP_2944				3547.53	1.29591	2.31271e-18	4.85446e-17	RSP_2806	lon
		21.5452	-1.48268	0.000266638	0.00101094	RSP_1302	motB1				275.431	1.29351	2.57043e-09	2.53254e-08	RSP_2211	RSP_2211
		97.4892	-1.48079	0.00721901	0.0186088	RSP_2158	RSP_2158				59.2955	1.29201	0.000464898	0.00165844	RSP_4127	RSP_4127
		181.77	-1.47886	3.80168e-05	0.000178191	RSP_6025	RSP_6025				458.044	1.28769	4.43089e-12	5.81638e-11	RSP_2738	RSP_2738
		44.5722	-1.47662	0.000670392	0.0022972	RSP_3207	RSP_3207				638.117	1.28682	4.42194e-15	7.71619e-14	RSP_0243	RSP_0243
		35.7107	-1.47476	0.00493087	0.013382	RSP_0802	RSP_0802				81.9838	1.28472	0.00179746	0.00548839	RSP_3165	RSP_3165
		151.524	-1.47405	0.00020875	0.000819347	RSP_4046	RSP_4046				123.895	1.2793	8.70899e-07	5.76838e-06	RSP_4191	bhpP
		213.437	-1.47346	2.98604e-14	4.80532e-13	RSP_0731	RSP_0731				207.009	1.27746	9.42957e-10	9.70888e-09	RSP_2083	uvrB
		74.0635	-1.46851	0.00411432	0.0114742	RSP_0927	lyrS				175.745	1.27605	1.99093e-09	1.98864e-08	RSP_2366	RSP_2366
		17389.6	-1.46851	2.50771e-12	3.37337e-11	RSP_4309	RSP_4309				63.5766	1.27363	3.43012e-06	2.0195e-05	RSP_3494	RSP_3494
		483.186	-1.46733	1.37731e-05	7.09053e-05	RSP_2113	ftsA				129.492	1.27132	0.000582283	0.00202888	RSP_1913	RSP_1913
		183.426	-1.46729	3.79116e-05	0.00017789	RSP_3080	RSP_3080				36.1998	1.26935	0.00616917	0.0162356	RSP_2275	RSP_2275
		44.9205	-1.46587	0.000577757	0.00201473	RSP_3181	RSP_3181				45.4731	1.26921	0.00157037	0.00489472	RSP_1925	RSP_1925
		252.375	-1.46573	8.33463e-17	1.62394e-15	RSP_0491	hupT				216.964	1.25947	2.84674e-06	1.70373e-05	RSP_0310	ureD
		101.072	-1.46566	5.83029e-05	0.000261094	RSP_0096	mtlK				30.5828	1.25452	0.020378	0.0459235	RSP_3927	RSP_3927
		13.7385	-1.46417	0.00441477	0.0121792	RSP_2632	argI				23.907	1.25426	0.0142182	0.0335933	RSP_2433	cheY2
		139.852	-1.46318	8.74967e-10	9.03024e-09	RSP_2448	glgB1				182.605	1.25407	1.07534e-10	1.24596e-09	RSP_2625	nifU
		99.4681	-1.46132	4.39424e-09	4.15065e-08	RSP_0685	RSP_0685				191.754	1.25126	3.75728e-05	0.000176491	RSP_4185	repB
		32.1227	-1.46115	0.00381003	0.0107567	RSP_0996	phaF				67.4294	1.24997	1.04091e-07	7.94862e-07	RSP_2757	RSP_2757
		58.3948	-1.46096	0.00422087	0.0117187	RSP_2732	RSP_2732				75.3021	1.24804	8.05638e-06	4.34305e-05	RSP_2740	RSP_2740
		61.4061	-1.45765	0.00401732	0.0112542	RSP_1051	RSP_1051				118.1	1.2455	0.00194096	0.00588107	RSP_1539	RSP_1539
		143.839	-1.45496	3.1588e-06	1.86989e-05	RSP_1590	RSP_1590				639.53	1.24297	1.56017e-15	2.82455e-14	RSP_4050	pdhB
		41.0306	-1.4535	0.00271311	0.00790641	RSP_6131	RSP_6131				43.8033	1.24204	0.00145093	0.00455299	RSP_1249	RSP_1249
		43.5846	-1.45236	0.00072429	0.00246633	RSP_2577	cycI				49.1462	1.24192	0.000127136	0.000530651	RSP_7360	RSP_7360
		15.3492	-1.45142	0.00396408	0.0111122	RSP_0791	pqqD				2758.56	1.23844	8.92009e-29	3.58869e-27	RSP_2401	RSP_2401
		64.6088	-1.4504	2.03016e-05	0.000101625	RSP_2650	RSP_2650				434.829	1.23791	0.00119215	0.00381997	RSP_0418	RSP_0418
		171.197	-1.45022	0.00310384	0.00894904	RSP_0911	dctQ				182.06	1.23734	2.41884e-05	0.000118488	RSP_2223	RSP_2223
		170.079	-1.44756	0.000183589	0.000733174	RSP_2809	RSP_2809				46.5724	1.23702	0.00577258	0.0153406	RSP_3552	RSP_3552
		57.6296	-1.44746	9.72104e-05	0.000415319	RSP_0493	hupV				61.2572	1.23444	0.00715718	0.0184887	RSP_2370	RSP_2370
		19.2682	-1.44677	0.00248401	0.00735218	RSP_3526	RSP_3526				430.415	1.23073	1.71221e-08	1.45873e-07	RSP_3597	RSP_3597
		108.576	-1.44368	0.000101411	0.000431567	RSP_2967	RSP_2967				301.425	1.22602	3.32597e-11	4.05937e-10	RSP_1531	RSP_1531
		35.6288	-1.44185	0.0239945	0.0527344	RSP_0804	DppD				163.044	1.2254	2.47604e-06	1.50467e-05	RSP_1363	mepA
		170.454	-1.44172	4.5081e-06	2.58073e-05	RSP_1858	glyS				236.638	1.22517	0.000688769	0.0023509	RSP_0584	RSP_0584
		20.0709	-1.44107	0.000678775	0.00232044	RSP_4071	RSP_4071				125.579	1.22427	7.45576e-06	4.04435e-05	RSP_2140	RSP_2140
		36.5089	-1.44095	0.0243894	0.0533863	RSP_3227	RSP_3227				295.363	1.22084	1.03101e-14	1.76367e-13	RSP_2262	RSP_2262
		42.1159	-1.44031	0.0244715	0.0535121	RSP_0816	RSP_0816				99.2974	1.22035	5.02569e-06	2.85073e-05	RSP_3125	RSP_3125
		109.629	-1.43675	0.00145511	0.00456166	RSP_0406	RSP_0406				200.894	1.22029	8.20328e-08	6.34222e-07	RSP_1083	RSP_1083
		20.3038	-1.4365	0.00193755	0.00587486	RSP_3035	RSP_3035				165.959	1.21953	1.19567e-06	7.71943e-06	RSP_0549	RSP_0549
		17.0282	-1.43433	0.0209645	0.0470267	RSP_4230	traW				247.825	1.21804	1.12115e-05	5.86209e-05	RSP_2141	RSP_2141
		38.362	-1.43396	0.0179677	0.041111	RSP_6222	RSP_6222				137.75	1.21481	1.28143e-07	9.64956e-07	RSP_1238	fxsA
		265.416	-1.43044	7.7514e-09	7.01664e-08	RSP_1952	RSP_1952				66.7622	1.21379	6.71046e-06	3.67216e-05	RSP_0227	RSP_0227
		26.169	-1.42926	0.018353	0.0419042	RSP_0981	RSP_0981				622.907	1.21341	2.35377e-17	4.75681e-16	RSP_1564	RSP_1564
		77.3063	-1.42826	0.0170396	0.0393815	RSP_2811	RSP_2811				105.393	1.21271	0.0119436	0.0288627	RSP_0650	RSP_0650
		12.9772	-1.42724	0.0140573	0.0332856	RSP_3872	RSP_3872				28.4747	1.21233	0.0192311	0.0437254	RSP_4144	RSP_4144
		193.021	-1.4248	4.68231e-05	0.000214606	RSP_3187	mdoG				41.445	1.21008	0.00904367	0.0225899	RSP_0162	RSP_0162
		110.356	-1.42183	1.05146e-07	8.01505e-07	RSP_0978	RSP_0978				105.426	1.20296	6.85668e-06	3.73805e-05	RSP_0224	RSP_0224
		28.7545	-1.41918	0.000110237	0.000466385	RSP_0638	RSP_0638				175.415	1.20073	0.000184332	0.000734792	RSP_0633	RSP_0633
		57.4023	-1.41698	0.0117858	0.0285131	RSP_3389	RSP_3389				639.149	1.19667	1.87343e-13	2.7877e-12	RSP_1680	pckA
		36.9453	-1.41315	0.000210782	0.000825834	RSP_1816	RSP_1816				150.822	1.1956	5.7902e-05	0.000259633	RSP_3923	RSP_3923
		69.6656	-1.41121	0.000277908	0.00104728	RSP_1414	RSP_1414				100.462	1.19367	3.40194e-05	0.000161546	RSP_3809	RSP_3809
		71.4256	-1.4104	1.48296e-05	7.58053e-05	RSP_3713	RSP_3713				175.625	1.19342	0.000792122	0.00265569	RSP_1430	RSP_1430
		146.876	-1.41002	1.00804e-07	7.73839e-07	RSP_2503	glmU				1838.87	1.19146	1.28487e-26	4.53882e-25	RSP_2293	clpA
		10.2933	-1.4073	0.0184262	0.0420272	RSP_7602	RSP_7602				277.976	1.18777	2.77119e-09	2.71189e-08	RSP_2953	RSP_2953
		50.6298	-1.40719	0.000112115	0.000472491	RSP_3862	RSP_3862				470.059	1.18658	1.79562e-08	1.52382e-07	RSP_1547	RSP_1547
		219.564	-1.40591	2.13461e-06	1.31745e-05	RSP_1975	RSP_1975				335.716	1.18475	1.49533e-10	1.7053e-09	RSP_3378	RSP_3378
		614.704	-1.40505	6.95229e-11	8.14223e-10	RSP_2974	RSP_2974				79.3304	1.18209	0.00236679	0.00703398	RSP_0612	RSP_0612
		253.766	-1.40106	1.43607e-11	1.83521e-10	RSP_3547	RSP_3547				507.722	1.18165	0.000266976	0.00101125	RSP_2110	murB
		52.1853	-1.39826	0.000910597	0.00300421	RSP_1348	RSP_1348				43.2158	1.17995	0.0194861	0.0442201	RSP_3115	RSP_3115
		638.814	-1.39655	8.72259e-21	2.16569e-19	RSP_2195	gcvP				184.866	1.17941	0.000360262	0.00131985	RSP_2343	RSP_2343
		62.0099	-1.39622	1.45479e-05	7.45407e-05	RSP_0117	RSP_0117				70.111	1.17523	0.00122566	0.0039187	RSP_2764	RSP_2764
		34.392	-1.39567	0.00590518	0.0156356	RSP_7580	RSP_7580				43.375	1.17211	0.0224726	0.0497166	RSP_0414	RSP_0414
		16.8168	-1.39358	0.00671736	0.0174772	RSP_3458	RSP_3458				139.539	1.17099	0.000477592	0.00169954	RSP_1200	RSP_1200
		64.4399	-1.39056	0.00301403	0.00870741	RSP_0858	RSP_0858				427.102	1.17045	0.000129455	0.000539291	RSP_0745	RSP_0745
		54.4362	-1.39022	1.00648e-05	5.32664e-05	RSP_3056	RSP_3056				116.311	1.16644	0.0041335	0.0115017	RSP_1793	RSP_1793
		35.6065	-1.38697	2.50605e-06	1.52078e-05	RSP_0512	RSP_0512				254.95	1.16347	1.01441e-07	7.77359e-07	RSP_0865	RSP_0865
		89.9234	-1.38281	0.000362019	0.00132405	RSP_0926	RSP_0926				421.762	1.16173	8.2525e-08	6.36893e-07	RSP_0375	RSP_0375
		66.921	-1.38052	0.00068024	0.00232362	RSP_3604	RSP_3604				112.268	1.16106	0.00384297	0.0108146	RSP_1486	RSP_1486
		80.1143	-1.3779	0.000939161	0.00309375	RSP_3317	RSP_3317				522.731	1.16067	1.3261e-10	1.52835e-09	RSP_3696	cysA
		274.565	-1.37456	1.83994e-10	2.07112e-09	RSP_1937	InfC				919.012	1.15963	1.28e-20	3.14216e-19	RSP_1157	PSrp1
		127.962	-1.37303	6.45751e-06	3.55163e-05	RSP_3607	RSP_3607				204.418	1.15746	4.2226e-07	2.93086e-06	RSP_1270	RSP_1270
		353.409	-1.37251	6.02996e-08	4.73783e-07	RSP_3621	RSP_3621				44.1501	1.15571	0.00231239	0.00688644	RSP_2873	aglE
		69.8758	-1.37141	2.71069e-09	2.66469e-08	RSP_1177	xylB				357.883	1.15434	1.43444e-07	1.0709e-06	RSP_4043	RSP_4043
		113.812	-1.36911	2.2335e-05	0.000110279	RSP_3347	RSP_3347				108.326	1.14857	0.0009927	0.0032382	RSP_3730	RSP_3730
		440.202	-1.36866	5.70036e-05	0.000255869	RSP_0912	dctM				1580.47	1.14795	1.60914e-12	2.19865e-11	RSP_6107	RSP_6107
		795.621	-1.36841	2.58244e-19	5.7542e-18	RSP_2297	atpA				444.683	1.14788	6.00484e-07	4.09592e-06	RSP_2561	exoP
		130.761	-1.36808	2.39239e-10	2.65177e-09	RSP_1075	RSP_1075				93.4356	1.14739	3.95468e-05	0.000183973	RSP_0171	RSP_0171
		44.8502	-1.36118	0.00413478	0.0115017	RSP_1857	RSP_1857				47.7335	1.14713	0.000205424	0.000809217	RSP_3937	RSP_3937
		35.4001	-1.35694	0.000532212	0.00187057	RSP_3355	RSP_3355				336.535	1.145	3.4816e-06	2.04426e-05	RSP_2046	RSP_2046
		40.1578	-1.34781	0.0240902	0.0528645	RSP_1236	dnaQ				72.9441	1.14394	0.000563945	0.00197449	RSP_2958	RSP_2958
		11.3834	-1.34717	0.012067	0.0291122	RSP_2034	RSP_2034				229.177	1.14301	0.000242501	0.000934931	RSP_1914	RSP_1914
		82.9757	-1.34596	2.03733e-05	0.000101867	RSP_0459	RSP_0459				99.4175	1.1415	1.3175e-05	6.8208e-05	RSP_2445	RSP_2445
		36.772	-1.34504	0.00726751	0.018707	RSP_0949	ostB				228.878	1.13721	5.52267e-07	3.7789e-06	RSP_1681	RSP_1681
		139.914	-1.34347	3.93425e-05	0.000183416	RSP_1623	RSP_1623				122.246	1.13305	5.4337e-06	3.0445e-05	RSP_3297	RSP_3297
		28.9997	-1.34287	0.000146264	0.000598979	RSP_1752	RSP_1752				282.263	1.13008	0.000340128	0.00125348	RSP_4045	fbaB
		32.0764	-1.341	0.00510358	0.0137562	RSP_1582	RSP_1582				443.868	1.12837	7.98576e-06	4.31033e-05	RSP_0383	RSP_0383
		45.7974	-1.33661	0.0155527	0.0362728	RSP_2581	RSP_2581				426.428	1.12766	0.000283664	0.00106619	RSP_2283	rpsD
		57.9828	-1.33059	0.000395358	0.00143392	RSP_3425	RSP_3425				116.057	1.12751	6.54863e-05	0.000289013	RSP_0799	RSP_0799
		547.903	-1.32821	3.51173e-08	2.85205e-07	RSP_1716	rplC				115.264	1.1237	0.000159344	0.000643449	RSP_0575	RSP_0575
		17.5552	-1.32569	0.00537733	0.0144048	RSP_3573	gvpA				72.4378	1.12115	0.000403554	0.00146097	RSP_2749	RSP_2749
		131.902	-1.32463	3.06311e-06	1.8182e-05	RSP_1596	deoB				46.138	1.12094	0.00866793	0.0217773	RSP_1422	RSP_1422
		78.228	-1.32444	2.15164e-08	1.80481e-07	RSP_2557	asnB				73.4009	1.12045	3.00503e-05	0.000144275	RSP_3676	RSP_3676
		57.096	-1.3211	6.69779e-05	0.000294256	RSP_0880	dadA2				654.79	1.12018	1.61083e-20	3.93205e-19	RSP_0923	map1
		209.164	-1.32053	5.29871e-07	3.63711e-06	RSP_0163	RSP_0163				82.2689	1.12001	0.0170899	0.0394766	RSP_3081	RSP_3081
		131.864	-1.31845	0.000158022	0.000639299	RSP_2328	mreC				459.288	1.11834	3.20515e-05	0.000152869	RSP_1383	RSP_1383
		925054	-1.318	0.000174995	0.00070208	RSP_4295	RSP_4295				46.4294	1.11692	0.000302574	0.00112802	RSP_2865	RSP_2865
		925054	-1.318	0.000174995	0.00070208	RSP_4350	RSP_4350				488.186	1.11212	5.35495e-12	7.00821e-11	RSP_0870	RSP_0870
		55.1816	-1.31703	0.000763442	0.00257743	RSP_4211	gapA-1				174.204	1.11143	6.95814e-06	3.78861e-05	RSP_6059	tatB
		117.534	-1.31587	0.000149504	0.00061006	RSP_0675	RSP_0675				188.337	1.11126	0.00168511	0.00518909	RSP_0983	RSP_0983
		56.6384	-1.31396	9.49307e-05	0.000407583	RSP_1748	bztB				119.816	1.10867	0.00164253	0.00507957	RSP_1692	pduO
		41.5113	-1.31172	0.000458187	0.00163735	RSP_3126	RSP_3126				88.0327	1.10653	0.000326019	0.00120558	RSP_4076	mvpA
		82.4269	-1.30952	0.00218892	0.00656827	RSP_2404	RSP_2404				299.71	1.10622	9.61121e-05	0.000411031	RSP_0111	RSP_0111
		35.1966	-1.30529	0.00158496	0.00493668	RSP_3695	argE				71.5534	1.10197	0.00226479	0.00677255	RSP_6106	RSP_6106
		99.7236	-1.3047	2.57058e-06	1.55776e-05	RSP_1074	uvrC				343.227	1.1019	1.61818e-07	1.20394e-06	RSP_1621	RSP_1621
		68.4521	-1.30385	5.34536e-05	0.000241681	RSP_4109	gmd				198.148	1.10149	3.72079e-06	2.16134e-05	RSP_1421	RSP_1421
		256.901	-1.30378	1.0113e-10	1.17804e-09	RSP_2779	catA				988.344	1.10093	6.51538e-06	3.57893e-05	RSP_2236	RSP_2236
		40.1168	-1.30005	0.000222677	0.000865413	RSP_0738	mobA				502.19	1.10051	0.00701633	0.0181572	RSP_3886	RSP_3886
		114.164	-1.29924	5.17647e-06	2.92101e-05	RSP_2880	gfdS				64.5581	1.09949	0.00993768	0.0245058	RSP_7529	RSP_7529
		70.093	-1.29825	0.00673392	0.0175098	RSP_0937	RSP_0937				485.938	1.09598	7.89504e-08	6.12571e-07	RSP_0273	bchI
		44.9926	-1.29722	0.00867502	0.0217773	RSP_0510	hypE				166.673	1.09496	0.000699815	0.00238486	RSP_2304	ribF
		84.0641	-1.29588	3.6362e-06	2.11787e-05	RSP_1015	RSP_1015				2448.01	1.09186	4.17311e-23	1.23348e-21	RSP_4245	RSP_4245
		295.781	-1.29322	2.04533e-08	1.72562e-07	RSP_0150	RSP_0150				51.1643	1.09137	0.00463727	0.0126882	RSP_2584	RSP_2584
		102.13	-1.29264	0.000246606	0.000949074	RSP_3559	RSP_3559				258.031	1.08663	1.97931e-09	1.98159e-08	RSP_0850	RSP_0850
		273.236	-1.2918	9.84598e-18	2.01796e-16	RSP_0741	RSP_0741				51.3005	1.08453	0.00048542	0.00172035	RSP_3704	RSP_3704
		149.385	-1.29144	0.000283326	0.00106584	RSP_1726	rplX				855.464	1.08224	9.00403e-09	8.0499e-08	RSP_7545	RSP_7545
		55.5859	-1.29099	3.06632e-09	2.97392e-08	RSP_0456	RSP_0456				371.888	1.07972	8.47876e-09	7.61162e-08	RSP_1141	RSP_1141
		72.3319	-1.29021	0.00524509	0.0140852	RSP_0755	nusB				180.055	1.07968	7.46841e-06	4.04617e-05	RSP_0900	RSP_0900
		177.437	-1.28875	4.48002e-05	0.000205986	RSP_0405	RSP_0405				2350.7	1.07737	0.00593924	0.0157066	RSP_1944	RSP_1944
		20.8078	-1.28873	0.00489575	0.0133117	RSP_3582	gvpN				53.1633	1.07619	0.00842059	0.0212842	RSP_0715	RSP_0715
		62.8683	-1.28819	0.0172109	0.0396718	RSP_0571	RSP_0571				64.4274	1.07318	0.0159669	0.0371991	RSP_1878	lipB
		20559.3	-1.28802	3.70934e-05	0.000174427	RSP_4314	RSP_4314				180.695	1.07125	1.92753e-07	1.41233e-06	RSP_1507	RSP_1507
		26.6844	-1.28651	0.0173358	0.0399174	RSP_0878	RSP_0878				55.3207	1.07107	0.0105317	0.0258242	RSP_3381	RSP_3381
		47.5871	-1.28483	0.0249178	0.0543786	RSP_1290	RSP_1290				266.782	1.07094	1.23624e-07	9.32548e-07	RSP_3163	RSP_3163
		5616.65	-1.28465	6.26792e-09	5.78219e-08	RSP_4329	RSP_4329				55.2036	1.06852	0.0025235	0.00746399	RSP_3360	RSP_3360
		244.586	-1.28117	0.000673345	0.0023055	RSP_0005	guaA				107.448	1.06842	0.00266289	0.00779141	RSP_3920	RSP_3920
		63.3972	-1.28111	9.83768e-05	0.000419477	RSP_4067	RSP_4067				108.129	1.06778	0.00381611	0.0107629	RSP_7385	RSP_7385
		36.7652	-1.27879	0.0227377	0.0501821	RSP_3340	rarD				706.504	1.06625	5.26898e-06	2.96935e-05	RSP_3589	ihfB
		430.647	-1.27615	7.03167e-05	0.00030768	RSP_2112	ftsQ				241.491	1.06349	3.94617e-08	3.16349e-07	RSP_3602	RSP_3602
		47.1855	-1.27414	0.000691951	0.00235991	RSP_2605	RSP_2605				390.208	1.0625	7.32892e-09	6.70403e-08	RSP_2018	RSP_2018
		111.136	-1.27354	5.37354e-08	4.25283e-07	RSP_3366	RSP_3366				371.661	1.05939	7.61006e-09	6.91751e-08	RSP_0398	RSP_0398
		151.851	-1.27345	2.14714e-06	1.32331e-05	RSP_1544	RSP_1544				475.947	1.05665	3.87192e-12	5.1448e-11	RSP_0357	RSP_0357
		217.985	-1.27294	5.81079e-10	6.09852e-09	RSP_1090	RSP_1090				36.3222	1.0553	0.00554625	0.0148207	RSP_1956	RSP_1956
		903499	-1.27153	5.51376e-05	0.00024852	RSP_4355	RSP_4355				52.8565	1.05497	0.00910292	0.022692	RSP_2244	RSP_2244
		44.8105	-1.27141	0.00511654	0.0137826	RSP_0014	RSP_0014				89.9544	1.05394	0.000342261	0.00126027	RSP_1979	RSP_1979
		171.666	-1.27115	0.000144987	0.000595434	RSP_0112	nuoN1				210.168	1.05385	0.000141353	0.000582711	RSP_2540	tatA
		245.699	-1.27102	8.32142e-11	9.71951e-10	RSP_1396	fbcF				99.0449	1.04838	0.000229348	0.000888953	RSP_2319	glnA
		35.9897	-1.26638	0.00507453	0.0137034	RSP_0094	smoK				166.147	1.04576	0.00366838	0.0103838	RSP_2313	RSP_2313
		65.9985	-1.26488	0.00394705	0.0110788	RSP_2519	RSP_2519				71.9638	1.04523	0.00107338	0.00348101	RSP_1285	cbbF1
		156.171	-1.25871	0.000261484	0.000994876	RSP_0255	pufX				433.703	1.04047	1.31887e-06	8.46454e-06	RSP_0591	RSP_0591
		487.78	-1.25821	6.70872e-07	4.53334e-06	RSP_1039	atpI				91.8389	1.039	0.0148025	0.0347472	RSP_2618	RSP_2618
		29.0431	-1.25598	0.000276884	0.00104432	RSP_3623	RSP_3623				54.5756	1.03898	0.000601275	0.00208504	RSP_3873	modD
		140.898	-1.25459	9.90678e-10	1.01761e-08	RSP_0851	RSP_0851				21.8104	1.03719	0.0223822	0.049643	RSP_3417	RSP_3417
		66.1069	-1.25228	6.70612e-06	3.67216e-05	RSP_1179	xylH				63.3295	1.03383	0.0111108	0.0271064	RSP_0401	RSP_0401
		25.8027	-1.25171	0.00558024	0.0148932	RSP_3791	RSP_3791				275.917	1.03324	2.08181e-05	0.000103971	RSP_0705	RSP_0705
		285.976	-1.25137	1.61457e-09	1.63526e-08	RSP_4273	fhuA				290.51	1.03306	1.46775e-06	9.35101e-06	RSP_1827	cox10
		1240.68	-1.25024	1.11254e-21	2.89461e-20	RSP_1164	RSP_1164				3569.01	1.03227	5.83481e-05	0.000261094	RSP_4322	RSP_4322
		15.2122	-1.24811	0.00450048	0.0123923	RSP_3130	RSP_3130				140.508	1.03186	0.00135495	0.00427852	RSP_1741	RSP_1741
		406.363	-1.24705	1.17054e-09	1.19953e-08	RSP_0102	nuoCD				1194.27	1.03182	9.47258e-16	1.72211e-14	RSP_1146	gltB
		78.9243	-1.24674	0.00134371	0.0042492	RSP_3174	RSP_3174				80.535	1.02964	0.0151147	0.0354126	RSP_2590	RSP_2590
		122.493	-1.24624	0.00204511	0.00617512	RSP_3550	RSP_3550				254.768	1.02905	3.34848e-09	3.24034e-08	RSP_1760	RSP_1760
		99.5305	-1.24536	0.00160411	0.00498202	RSP_1568	RSP_1568				235.937	1.0268	0.000250405	0.000959446	RSP_1033	RSP_1033
		17.8112	-1.24164	0.00743408	0.0190792	RSP_6193	RSP_6193				171.706	1.02669	6.87317e-05	0.000301351	RSP_3160	RSP_3160
		119.912	-1.23874	0.0127347	0.0305366	RSP_0676	RSP_0676				44.8038	1.02658	0.00360792	0.0102352	RSP_3201	RSP_3201
		181.437	-1.23587	7.91251e-06	4.2761e-05	RSP_3715	RSP_3715				543.923	1.0263	5.57974e-13	8.05447e-12	RSP_4042	RSP_4042
		66.0664	-1.23541	0.00279546	0.00813549	RSP_0684	RSP_0684				84.5812	1.02337	0.00632636	0.0166003	RSP_0866	RSP_0866
		135.428	-1.23498	0.000146029	0.00059858	RSP_3919	RSP_3919				63.6649	1.02182	0.00671005	0.0174687	RSP_2435	cheW1
		198.723	-1.23394	4.85689e-05	0.000222139	RSP_0104	nuoF1				109.294	1.01385	6.29188e-05	0.000279246	RSP_0828	RSP_0828
		161.598	-1.23071	0.000302709	0.00112802	RSP_0975	RSP_0975				96.4646	1.01012	0.000248234	0.000953649	RSP_3475	RSP_3475
		22.1291	-1.22751	0.00809659	0.0205369	RSP_3447	RSP_3447				55.5089	1.00936	0.00195955	0.00593328	RSP_1780	RSP_1780
		24.2422	-1.22713	0.00622598	0.0163653	RSP_1781	RSP_1781				123.177	1.00631	0.000304323	0.00113283	RSP_2483	repA
		48.8363	-1.22707	0.00220583	0.00660988	RSP_0177	RSP_0177				138.529	1.00562	4.03755e-06	2.32052e-05	RSP_0184	RSP_0184
		105.167	-1.22515	0.000288833	0.00108281	RSP_0959	RSP_0959				79.3704	1.00145	0.000982678	0.00321669	RSP_7389	RSP_7389
		166.735	-1.22093	2.76798e-10	3.03708e-09	RSP_1682	RSP_1682				161.654	1.00008	0.000593048	0.00206144	RSP_1762	RSP_1762
		46.8522	-1.2204	0.00113471	0.0036575	RSP_2230	RSP_2230				307.594	0.99769	2.67643e-05	0.0001295	RSP_2002	trpG
		93.4925	-1.22025	0.0216486	0.048287	RSP_3350	RSP_3350				105.72	0.995992	8.39047e-05	0.000363838	RSP_3376	aroQ
		155.881	-1.21487	2.44641e-08	2.03633e-07	RSP_3044	dorS				1166.58	0.991939	8.96873e-07	5.93137e-06	RSP_0966	sucD
		172.006	-1.21457	0.000135292	0.000559851	RSP_1832	RSP_1832				842.406	0.990871	1.70815e-06	1.0772e-05	RSP_0782	RSP_0782
		233.851	-1.2106	3.85274e-09	3.68203e-08	RSP_1359	recQ
		105.152	-1.20848	1.73747e-07	1.2839e-06	RSP_1694	RSP_1694
		212.26	-1.20815	0.0222494	0.0494748	RSP_3136	RSP_3136
		436.473	-1.20759	5.72761e-12	7.47342e-11	RSP_0695	ccoO
		83.8241	-1.20417	0.010747	0.0263075	RSP_2929	RSP_2929
		23.9791	-1.20233	0.00369977	0.0104658	RSP_2556	RSP_2556
		112.923	-1.20225	1.14007e-06	7.392e-06	RSP_1854	trkH3
		82.7673	-1.20213	5.23635e-08	4.1594e-07	RSP_0461	RSP_0461
		85.6565	-1.20091	0.000110545	0.000467236	RSP_2593	flhS
		30.8243	-1.2002	0.0112603	0.0274095	RSP_3446	RSP_3446
		88.7299	-1.19881	0.00455606	0.0125213	RSP_1744	RSP_1744
		55.2024	-1.19729	0.000538885	0.00189132	RSP_1749	bztC
		372.652	-1.19652	1.31165e-05	6.80086e-05	RSP_2288	RSP_2288
		250.936	-1.19284	4.56248e-07	3.15167e-06	RSP_1998	RSP_1998
		146.541	-1.19171	1.24548e-09	1.27033e-08	RSP_2979	amiC
		270.557	-1.19086	2.55793e-05	0.000124459	RSP_2329	mreB
		111.614	-1.18897	0.000558552	0.00195719	RSP_2272	ampD
		99.9557	-1.18823	5.85382e-05	0.000261675	RSP_2312	RSP_2312
		116.013	-1.18661	9.08454e-05	0.000391979	RSP_3803	RSP_3803
		94.6384	-1.18646	5.02723e-09	4.6874e-08	RSP_4257	RSP_4257
		22.5837	-1.1863	0.0210073	0.0470741	RSP_3400	RSP_3400
		2672.24	-1.18538	2.04053e-15	3.60411e-14	RSP_0196	clpX
		70.1043	-1.18341	0.00613017	0.0161428	RSP_4275	RSP_4275
		211.481	-1.1816	0.0203881	0.0459235	RSP_2460	alr
		42.0469	-1.18127	0.0172062	0.0396718	RSP_6065	RSP_6065
		95.5325	-1.18037	2.01361e-06	1.25526e-05	RSP_0666	RSP_0666
		568.364	-1.17842	3.73853e-09	3.58585e-08	RSP_2521	nuoG
		354.245	-1.17649	2.1139e-06	1.30717e-05	RSP_7569	RSP_7569
		92.545	-1.17284	0.000744313	0.00252265	RSP_0070	fliD
		334.699	-1.17241	1.43463e-06	9.15338e-06	RSP_0976	sdhA
		217.664	-1.17223	0.000208483	0.00081904	RSP_2534	RSP_2534
		116.512	-1.17086	1.45385e-05	7.45407e-05	RSP_0467	ubiD
		433.199	-1.16797	2.46557e-08	2.04055e-07	RSP_0448	RSP_0448
		81.1792	-1.16635	0.00523011	0.0140537	RSP_1710	rpsL
		438.238	-1.16459	8.65415e-07	5.74081e-06	RSP_2298	atpG
		21.1571	-1.16393	0.0146377	0.0344489	RSP_1636	RSP_1636
		178.853	-1.16348	6.82034e-06	3.72291e-05	RSP_0823	SHMT
		59.8306	-1.16012	0.0135568	0.032188	RSP_0267	crtC
		191.916	-1.15997	0.000565407	0.00197801	RSP_2507	ompW
		1610.12	-1.15988	5.16426e-31	2.41276e-29	RSP_1165	infB
		44.7213	-1.15955	0.000249754	0.000957794	RSP_1417	RSP_1417
		80.3687	-1.15742	0.00030014	0.00112037	RSP_2876	RSP_2876
		49.7218	-1.15723	3.68766e-05	0.000173596	RSP_0845	RSP_0845
		98.4068	-1.15494	0.000112683	0.000473967	RSP_0090	smoC
		378.594	-1.15435	0.00727517	0.0187156	RSP_3698	cysT
		132.536	-1.15196	5.63286e-08	4.44996e-07	RSP_0569	RSP_0569
		46.8954	-1.15078	0.00362227	0.0102666	RSP_2925	RSP_2925
		62.361	-1.1496	0.00684545	0.0177573	RSP_2209	RSP_2209
		96.5204	-1.14946	0.00407982	0.0113999	RSP_0879	RSP_0879
		105.895	-1.14698	0.00374488	0.0105865	RSP_0445	RSP_0445
		89.2249	-1.14695	0.0151953	0.0354991	RSP_0450	RSP_0450
		471.323	-1.14624	0.000831387	0.00277235	RSP_0844	RSP_0844
		69.0652	-1.146	0.0130975	0.0312513	RSP_0042	cheA3
		268.651	-1.14365	9.03294e-06	4.80982e-05	RSP_2868	RSP_2868
		218.859	-1.14357	0.000617938	0.00213442	RSP_2424	RSP_2424
		291.165	-1.14246	0.00197976	0.00599029	RSP_6109	pufK
		128440	-1.14174	0.00431943	0.0119456	RSP_4293	RSP_4293
		128440	-1.14174	0.00431943	0.0119456	RSP_7710	RSP_7710
		128437	-1.14173	0.00432001	0.0119456	RSP_4357	RSP_4357
		839.063	-1.14001	4.04748e-10	4.35305e-09	RSP_2573	RSP_2573
		106.51	-1.13865	9.41297e-07	6.17815e-06	RSP_2238	RSP_2238
		36.7566	-1.13582	0.0215448	0.0481049	RSP_0077	flgH
		29.9734	-1.13366	0.00333837	0.00953037	RSP_3306	RSP_3306
		21.77	-1.1321	0.0121334	0.0292399	RSP_2281	RSP_2281
		57.7413	-1.12639	0.000252624	0.000965657	RSP_0548	RSP_0548
		71.0744	-1.12258	0.00693027	0.0179452	RSP_2416	RSP_2416
		120.084	-1.12035	0.000338444	0.00124833	RSP_2013	RSP_2013
		57.7386	-1.11887	4.08132e-05	0.000189459	RSP_3029	RSP_3029
		93.2898	-1.11796	0.000270674	0.00102268	RSP_0796	cobQ
		59.7817	-1.1176	0.0087464	0.0219291	RSP_6001	RSP_6001
		106.125	-1.1175	4.49285e-05	0.000206357	RSP_2914	RSP_2914
		159.492	-1.11676	2.30931e-06	1.41124e-05	RSP_2237	RSP_2237
		199.055	-1.11641	6.46888e-07	4.37888e-06	RSP_1946	RSP_1946
		76.2678	-1.11596	5.49436e-06	3.07246e-05	RSP_4078	RSP_4078
		54.2657	-1.10952	0.0168835	0.039067	RSP_4085	RSP_4085
		71.7116	-1.10947	0.000100726	0.000429073	RSP_3481	RSP_3481
		45.6882	-1.10792	0.0112138	0.027327	RSP_2119	RSP_2119
		151.764	-1.10752	9.14245e-06	4.85968e-05	RSP_2736	pgi
		120.3	-1.10277	0.000107064	0.000453847	RSP_3556	xdhC
		42.4981	-1.09776	0.00129306	0.00411298	RSP_2934	hutI
		100.597	-1.09385	1.47928e-05	7.57064e-05	RSP_1465	RSP_1465
		287.494	-1.09041	1.96501e-05	9.8705e-05	RSP_1799	secF
		88.4023	-1.0894	0.000669679	0.0022972	RSP_0154	RSP_0154
		673.379	-1.08912	0.000103973	0.000441174	RSP_0718	rpsU
		51.7276	-1.08679	0.015591	0.0363429	RSP_0348	RSP_0348
		526.886	-1.08672	4.35453e-10	4.64876e-09	RSP_0965	sucA
		45.1788	-1.08293	0.016358	0.037988	RSP_3373	RSP_3373
		148.229	-1.08192	1.39963e-06	8.95642e-06	RSP_0119	RSP_0119
		569.873	-1.07941	0.000276022	0.00104198	RSP_0557	RSP_0557
		32.9669	-1.07885	0.00458964	0.0125976	RSP_2059	RSP_2059
		105.155	-1.07418	0.00183389	0.00559568	RSP_1218	mutS
		2119.89	-1.07148	3.74674e-17	7.4336e-16	RSP_1708	fusA1
		451.552	-1.06602	9.8342e-09	8.72033e-08	RSP_0840	leuS
		607.062	-1.0642	1.63534e-08	1.40426e-07	RSP_0992	phaA/B
		90.8307	-1.0631	0.0081521	0.0206536	RSP_2245	hisH
		147.818	-1.06021	2.77506e-06	1.66772e-05	RSP_2377	tdh
		46.9397	-1.05985	0.00570797	0.0152061	RSP_3240	RSP_3240
		25.2951	-1.05781	0.0102177	0.0251394	RSP_3852	RSP_3852
		145.537	-1.05689	5.44419e-05	0.000245894	RSP_2446	RSP_2446
		157.071	-1.05531	0.00165637	0.00511871	RSP_1802	ccmB
		189.868	-1.0551	1.23683e-05	6.4206e-05	RSP_1095	mutL
		22.1467	-1.05416	0.018981	0.0431793	RSP_2660	RSP_2660
		111.846	-1.054	0.000173648	0.000698612	RSP_1354	RSP_1354
		54.9772	-1.05202	0.000154837	0.00062758	RSP_2190	RSP_2190
		40.8006	-1.05113	0.0100521	0.0247599	RSP_2235	RSP_2235
		369.704	-1.04866	1.73843e-05	8.77291e-05	RSP_2296	atpH
		162.54	-1.04819	0.000189032	0.000750771	RSP_2333	nadE
		939.255	-1.04617	3.60761e-08	2.92446e-07	RSP_1188	wcaG
		135.464	-1.03731	0.000419361	0.00151088	RSP_0166	dksA
		102.772	-1.03676	0.00393855	0.011063	RSP_0399	RSP_0399
		85.2209	-1.03581	0.000264726	0.00100545	RSP_4195	RSP_4195
		38.1552	-1.03481	0.00433009	0.0119607	RSP_1535	RSP_1535
		62.8315	-1.03437	0.000436143	0.00156874	RSP_6085	RSP_6085
		925.035	-1.02724	1.73218e-10	1.95489e-09	RSP_3591	RSP_3591
		90377.9	-1.02579	4.84707e-06	2.75301e-05	RSP_4333	RSP_4333
		291.854	-1.02475	0.000244127	0.000940363	RSP_3724	RSP_3724
		194.633	-1.02414	0.0188816	0.0429982	RSP_2563	exoA
		157.545	-1.02288	4.7994e-07	3.29958e-06	RSP_0955	RSP_0955
		119.228	-1.02232	0.0060206	0.0158928	RSP_0652	RSP_0652
		49.9643	-1.01875	0.00539939	0.0144549	RSP_0852	fghA
		144.813	-1.01806	1.08294e-06	7.03344e-06	RSP_2429	RSP_2429
		75.8566	-1.01704	0.0197093	0.0446958	RSP_2306	RSP_2306
		104.915	-1.01393	0.00322791	0.00926371	RSP_3233	RSP_3233
		333.139	-1.01357	2.45355e-08	2.03837e-07	RSP_0147	glnA1
		38.4841	-1.01256	0.0169899	0.0392875	RSP_3846	RSP_3846
		158.153	-1.00952	1.78211e-08	1.51532e-07	RSP_2260	RSP_2260
		131.005	-1.00925	0.0168856	0.039067	RSP_2284	RSP_2284
		160.057	-1.00754	0.00207618	0.00626025	RSP_2827	cobN
		84.2228	-1.00737	7.43469e-09	6.77227e-08	RSP_3379	RSP_3379
		185.721	-1.00643	0.00126621	0.0040394	RSP_3820	rpmA
		55.3097	-1.00576	0.00123139	0.00393411	RSP_1821	RSP_1821
		91.2851	-1.00384	0.000649799	0.00223545	RSP_3086	RSP_3086
		191.384	-1.0034	0.00339893	0.00969687	RSP_6043	gatC
		181.093	-1.00297	0.000109167	0.00046231	RSP_1845	xseA
		31.1859	-1.00109	0.00413092	0.0115017	RSP_2380	catC
		64.6716	-1.00021	0.000325349	0.00120412	RSP_0902	RSP_0902
		118.721	-0.999886	0.0034342	0.00979106	RSP_2420	RSP_2420
		43.4469	-0.999708	0.00583814	0.0155053	RSP_2936	hutU
		164.207	-0.998815	0.00127205	0.00405507	RSP_1861	RSP_1861
		163.128	-0.997894	3.52219e-06	2.06137e-05	RSP_3346	RSP_3346
		718.601	-0.996095	1.44124e-08	1.25495e-07	RSP_0287	bchH
		107.474	-0.992829	0.00115863	0.00372632	RSP_2146	trgB
		112.394	-0.992652	0.00653886	0.0170844	RSP_2851	RSP_2851
